# 1 SAC1 Degrades its Lipid Substrate PtdIns4P in the 2 Endoplasmic Reticulum to Maintain a Steep 3 Chemical Gradient with Donor Membranes

4 James P. Zewe<sup>1</sup>, Rachel C. Wills<sup>1</sup>, Sahana Sangappa<sup>1</sup>, Brady D. Goulden<sup>1</sup> and Gerald R. V.  
5 Hammond<sup>1</sup>

6 University of Pittsburgh School of Medicine, Department of Cell Biology (Pittsburgh, PA,  
7 United States)

## 8 **Abstract**

9 Gradients of PtdIns4P between organelle membranes and the endoplasmic reticulum (ER)  
10 are thought to drive counter-transport of other lipids via non-vesicular traffic. This novel  
11 pathway requires the SAC1 phosphatase to degrade PtdIns4P in a “cis” configuration at the  
12 ER to maintain the gradient. However, SAC1 has also been proposed to act in “trans” at  
13 membrane contact sites, which could oppose lipid traffic. It is therefore crucial to determine  
14 which mode SAC1 uses in living cells. We report that acute inhibition of SAC1 causes  
15 accumulation of PtdIns4P in the ER, that SAC1 does not enrich at membrane contact sites,  
16 and that SAC1 has little activity in “trans”, unless a linker is added between its ER-anchored  
17 and catalytic domains. The data reveal an obligate “cis” activity of SAC1, supporting its role  
18 in non-vesicular lipid traffic and implicating lipid traffic more broadly in inositol lipid  
19 homeostasis and function.

## 20 **Keywords**

21 Phosphatidylinositols, PI4P, PIP2, membrane junctions,

## 1 Introduction

2 Phosphatidylinositol-4-phosphate (PtdIns4P) is arguably the most functionally diverse lipid  
3 molecule in eukaryotic cells. Firstly, PtdIns4P is a crucial metabolic intermediate in the  
4 synthesis of the plasma membrane inositol lipids PtdIns(4,5)P<sub>2</sub>, PtdInsP<sub>3</sub> and PtdIns(3,4)P<sub>2</sub>  
5 (Brockerhoff and Llou, 1962; Stephens et al., 1991; Posor et al., 2013), each with their own  
6 array of cellular functions (reviewed in (Balla, 2013)). Secondly, PtdIns4P binds to and  
7 thereby recruits and/or activates many proteins involved in cellular traffic (Tan and Brill,  
8 2013). These include proteins regulating vesicular traffic at the endoplasmic reticulum  
9 (ER), late endosomes/lysosomes(LEL) and Golgi (Wang et al., 2007; 2003; Jović et al.,  
10 2012; 2014; Klinkenberg et al., 2014), as well as non-vesicular lipid transport at the plasma  
11 membrane (PM), LEL and Golgi (Mesmin et al., 2013; Chung et al., 2015; von Filseck et al.,  
12 2015a; Zhao and Ridgway, 2017).

13 Such a cardinal role in controlling membrane function throughout the secretory and  
14 endocytic pathways implies the existence of exquisite homeostatic mechanisms that control  
15 PtdIns4P abundance. PtdIns4P is synthesized by two families of PI 4-kinases, each with  
16 their own unique modes of regulation (Boura and Nencka, 2015). However, much recent  
17 attention has focused on control of PtdIns4P through regulation of its degradation. The  
18 primary route of the lipid's catabolism is via removal of the 4-phosphate by SAC family lipid  
19 phosphatases (Balla, 2013). The principle enzyme in budding yeast is the highly conserved  
20 SAC1 enzyme (Guo et al., 1999; Rivas et al., 1999; Hughes et al., 2000). SAC1 is an  
21 integral membrane protein with two C-terminal transmembrane helices (Whitters et al.,  
22 1993; Konrad et al., 2002; Nemoto et al., 2000), which localizes primarily to the ER but is  
23 also able to traffic to the Golgi depending on the growth status of the cell (Faulhammer et  
24 al., 2007; Blagoveshchenskaya et al., 2008). The ER localization at first seemed counter-

1 intuitive, given functions of PtdIns4P at the Golgi, PM and endosomes; but the realization  
2 that the ER makes extensive membrane contact sites (MCS) with all of these organelles  
3 raised a tantalizing possibility as to how ER-localized SAC1 could control PtdIns4P  
4 abundance: that it could perhaps localize to these MCS and “reach across” the gap to  
5 degrade PtdIns4P in a “trans” configuration (Phillips and Voeltz, 2015). Indeed, the crystal  
6 structure of SAC1 revealed an approximately 70 amino acid region between the N-terminal  
7 catalytic domain and C-terminal transmembrane domains that was disordered in the  
8 crystal; this stretch was proposed to be able to span the 15-20 nm gap between ER and  
9 organelle at MCS and confer “trans” activity (Manford et al., 2010). Subsequently,  
10 targeting of SAC1 to ER-PM MCS by the Osh3 protein was proposed to allow  
11 dephosphorylation of PM PtdIns4P by cortical ER-localized SAC1 in “trans”, hence  
12 controlling plasma membrane inositol lipid synthesis and function (Stefan et al., 2011).  
13 More recently, dynamic localization of SAC1 to ER-PM MCS has been proposed to regulate  
14 PM inositol lipid function in mammalian cells (Dickson et al., 2016).

15 The picture is complicated by a recently proposed novel mode of action for PtdIns4P: that  
16 its synthesis on cellular membranes can be used to drive counter-transport of other lipids  
17 against their concentration gradients (de Saint-Jean et al., 2011). In this model, oxysterol  
18 binding protein (OSBP)-related lipid transfer proteins operating at MCS collect their lipid  
19 cargoes from the ER (where they are synthesized) and transfer them to the destination  
20 membrane (such as the PM or Golgi). The lipid transfer domain then avoids a futile reverse  
21 transfer reaction because it preferentially collects and back-traffics a PtdIns4P molecule  
22 instead. Crucially, futile traffic of PtdIns4P from the ER back to the destination membrane  
23 is prevented because the PtdIns4P is degraded by ER-localized SAC1, acting in this case in a  
24 “cis” configuration. Therefore, the transporter must traffic a cargo lipid back to the  
25 destination in the next cycle, and the vectorial nature of the transfer is conserved.

1 Ultimately, the energy of ATP hydrolysis by PI4K during PtdIns4P synthesis is harnessed to  
2 build and maintain a steep chemical gradient of PtdIns4P at the destination membrane with  
3 respect to the ER. Flow of PtdIns4P down this concentration gradient via OSBPs thus  
4 powers counter-transport of other lipids against their own chemical gradients. We think of  
5 this cycle as a “phosphoinositide-motive force” (PPI<sub>MF</sub>), since it is conceptually related to  
6 the proton-motive force and other ionic gradients that drive counter-transport of ions and  
7 small solutes across membranes (Mesmin et al., 2013). Direct evidence for PPI<sub>MF</sub>-driven  
8 transfer reactions have now been presented at the trans-Golgi network (TGN) for sterols  
9 (Mesmin et al., 2013; von Filseck et al., 2015b) and at the PM for phosphatidylserine (von  
10 Filseck et al., 2015a; Chung et al., 2015).

11 A critical requirement for the PPI<sub>MF</sub> is that SAC1 acts in a “cis” configuration in the ER;  
12 “trans” activity would act to dissipate the PtdIns4P gradients at MCS and make counter-  
13 transport much less efficient. *In vitro* experiments have demonstrated that SAC1 can indeed  
14 act in the required “cis” configuration (Mesmin et al., 2013; von Filseck et al., 2015b).

15 However, an obligate “cis” acting SAC1 makes it much harder to understand how PtdIns4P  
16 abundance is regulated with respect to its other metabolic and trafficking functions,  
17 especially at the PM. Therefore, a central question in understanding the regulation of  
18 protein and lipid traffic is whether SAC1 activity in cells occurs in an obligatory “cis” or  
19 “trans” configuration, or whether the enzyme can switch between modes. We address this  
20 crucial question here. We present evidence for “cis” activity in mammalian cells, show that  
21 SAC1 fails to enrich at ER-PM MCS and, finally, we show that SAC1 does not possess a  
22 conformation that allows it to traverse ER-PM MCS and act in “trans”. Collectively, our  
23 results support a central role for SAC1 in driving the PPI<sub>MF</sub>, and implicate non-vesicular  
24 PtdIns4P traffic in the control of inositol lipid metabolism and function more generally.



## 1 **Materials and methods**

### 2 *Cell Culture and Transfection*

3 COS-7 African Green monkey fibroblasts were obtained from ATCC (CRL-1651) and 293A  
4 cells (a HEK 293 subclone with flat morphology) were obtained from ThermoFisher  
5 (R70507). Cell lines were handled independently to prevent cross-contamination, and were  
6 propagated to no more than passage 30. They were cultivated in growth medium consisting  
7 of DMEM (low glucose, glutamax supplement, pyruvate; ThermoFisher 10567022)  
8 supplemented with 10% heat-inactivated fetal bovine serum (ThermoFisher 10438-034),  
9 100 u/ml penicillin, 100  $\mu$ g/ml streptomycin (ThermoFisher 15140122) and 0.1%  
10 chemically-defined lipid supplement (ThermoFisher 11905031) in 75 cm<sup>2</sup> vented tissue  
11 culture flasks. Twice per week, almost confluent cultures were rinsed in PBS and suspended  
12 with 1 ml TrpLE Express (no phenol red; ThermoFisher 12604039) and diluted 1:5 for  
13 propagation in fresh flasks. For experiments, cells were seeded at 12.5-50% confluence on  
14 10  $\mu$ g/ml fibronectin (ThermoFisher 33016-015)-coated 35 mm dishes containing 20 mm  
15 #1.5 glass bottoms (CellVis D35-22-1.5-N) in 2 ml growth medium.

16 Cells were transfected 1-24 hours after seeding, once they had reached 25% (TIRF) or 50%  
17 (confocal) confluence. 0.5-1  $\mu$ g plasmid DNA was complexed with 3  $\mu$ g Lipofectamine 2000  
18 (ThermoFisher 11668019) in 200  $\mu$ l Opti-MEM (ThermoFisher 51985091) for > 5 min  
19 before adding to the cells. Cells were then used for experiments 6 or 18-24 hours post  
20 transfection.

### 21 *Reagents*

22 Rapamycin (Fisher Scientific BP2963-1) was dissolved in DMSO to 1 mM. ATP (Sigma  
23 10127523001) was dissolved to 100 mM in 200 mM Tris base with 100 mM MgCl<sub>2</sub>.

1 Carbachol (Fisher Scientific AC10824-0050) was dissolved in water to 50 mM. bpV(HOPic)  
 2 (EMD Millipore 203701) was dissolved in DMSO at 10 mM. All were stored as aliquots at –  
 3 20°C. Hydrogen peroxide (30% solution; EMD Millipore HX0635-3) was stored at 4°C and  
 4 diluted fresh before use. Fura-red -AM (ThermoFisher F3021) was dissolved in 20%  
 5 pluronic F-127 (ThermoFisher P3000MP) to 1 mg/ml before use and stored at –20°C.  
 6 CellMask deep red (ThermoFisher C10046) was stored at –20°C and thawed before  
 7 dilution.

## 8 *Plasmids*

9 Plasmids were constructed in the former Clontech pEGFP-C1 and -N1 backbones. For the  
 10 most part, the following fluorescent protein fusions were utilized: Unless stated, EGFP  
 11 refers to *Aequorea victoria* GFP with F64L and S65T mutations (Cormack et al., 1996) with  
 12 human codon optimization. mCherry is an optimized *Discoma* DsRed monomeric variant  
 13 (Shaner et al., 2004). iRFP is the iRFP713 variant of *Rhodospseudomonas palustris*  
 14 bacteriophytochrome BphP2-derived near-infrared fluorescent protein (Shcherbakova and  
 15 Verkhusha, 2013). mTagBFP2 is an optimized blue-fluorescing mutant of the sea anemone  
 16 *Entacmaea quadricolor* GFP-like protein eqFP578 (Subach et al., 2011).

17 Plasmids in **Table 1** were constructed using NEB HiFi assembly (New England Biolabs  
 18 E5520S) or standard restriction cloning.

19

| Plasmid                                 | Backbone    | Insert                                                             | Ref                 |
|-----------------------------------------|-------------|--------------------------------------------------------------------|---------------------|
| APX1-GFP1-10                            | APX1        | super-folder GFP                                                   | This study          |
| CDV-hyPBBase                            | pigg        | <i>piggyBAC</i> transposase                                        | (Yusa et al., 2011) |
| NES-EGFP-P4Mx1                          | pEGFP-C1    | <i>X. leavis map2k1.L(32-44):EGFP:L. pneumophila SidM(546-647)</i> | This study          |
| FKBP-mCherry                            | pmCherry-N1 | <i>FKBP1A</i> (isoform a, 3-108):mCherry                           | This Study          |
| SAC1 <sup>ΔTMD</sup> -FKBP-mCherry      | pmCherry-N1 | <i>SACMIL</i> (1-521): <i>FKBP1A</i> (3-108):mCherry               | This study          |
| SAC1 <sup>C389SΔTMD</sup> -FKBP-mCherry | pmCherry-N1 | <i>SACMIL</i> (C389S; 1-521): <i>FKBP1A</i> (3-108):mCherry        | This study          |
| iRFP-Sec61β                             | piRFP-C1    | iRFP: <i>SEC61B</i>                                                | This study          |
| mKO-ManII                               | pmKO-N1     | Kusabira Orange 2: <i>Man2a</i> (1-102)                            | Tamas Balla         |
| mCherry-VAPB                            | pmCherry-C1 | mCherry: <i>VAPB</i>                                               | This study          |

|                                          |                         |                                                                                                                    |                                                |
|------------------------------------------|-------------------------|--------------------------------------------------------------------------------------------------------------------|------------------------------------------------|
| mCherry-MAPPER                           | pmCherry-C1             | mCherry:MAPPER                                                                                                     | (Chang et al., 2013)                           |
| EGFP-MAPPER                              | pEGFP-C1                | EGFP:MAPPER                                                                                                        | (Chang et al., 2013)                           |
| GFP-ORP5                                 | pEGFP-C1                | EGFP: <i>OSBPL5</i> (isoform a)                                                                                    | (Sohn et al., 2016)                            |
| GFP-E-Syt2                               | pEGFP-C1                | EGFP: <i>ESYT2</i>                                                                                                 | (Giordano et al., 2013) Addgene plasmid #66831 |
| EGFP-SAC1                                | pEGFP-C1                | EGFP: <i>SACMIL</i>                                                                                                | (Sohn et al.)                                  |
| mEmerald-N16-Calreticulin                | pmEmerald-N1            | mEmerald: <i>CALR</i>                                                                                              | Michael Davidson (Addgene plasmid #54023)      |
| GFP-Sec61 $\beta$                        | pAcGFP-C1-Sec61 $\beta$ | <i>Aequorea coerulea</i> GFP: <i>SEC61B</i>                                                                        | (Voeltz et al., 2006) Addgene plasmid #15108   |
| EGFP-E-Syt1                              | pEGFP-C1                | EGFP: <i>ESYT1</i>                                                                                                 | (Giordano et al., 2013) Addgene plasmid #66830 |
| EGFP-STIM1                               | pEGFP-C1                | <i>STIM1</i> (isoform 1 1-22):EGFP: <i>STIM1</i> (23-791)                                                          | (Várnai et al., 2007)                          |
| EGFP-Nir2                                | pEGFP-N1                | EGFP: <i>PITPNM1</i> (isoform 2)                                                                                   | (Kim et al., 2015)                             |
| EGFP-P4Mx2                               | pEGFP-C1                | EGFP: <i>L. pneumophila SidM</i> (546-647): <i>SidM</i> (546-647)                                                  | (Hammond et al., 2014)                         |
| Lyn <sub>in</sub> -FRB-iRFP              | piRFP-N1                | <i>LYN</i> (1-11): <i>MTOR</i> (2021-2113):iRFP                                                                    | (Hammond et al., 2014)                         |
| mCherry-FKBP                             | pmCherry-C1             | mCherry: <i>FKBP1A</i> (3-108):[GGSA],GG                                                                           | (Hammond et al., 2014)                         |
| mCherry-FKBP-SAC1                        | pmCherry-C1             | mCherry: <i>FKBP1A</i> (3-108):[GGSA],GG: <i>SACMIL</i>                                                            | This study                                     |
| mCherry-FKBP-SAC1 <sup>C389S</sup>       | pmCherry-C1             | mCherry: <i>FKBP1A</i> (3-108):[GGSA],GG: <i>SACMIL</i> <sup>C389S</sup>                                           | This Study                                     |
| mCherry-SAC1-FKBP                        | pmCherry-C1             | mCherry: <i>SACMIL</i> : <i>FKBP1A</i> (3-108)                                                                     | This study                                     |
| mCherry-SAC1 <sup>C389S</sup> -FKBP      | pmCherry-C1             | mCherry: <i>SACMIL</i> <sup>C389S</sup> : <i>FKBP</i> (3-108)                                                      | This study                                     |
| SAC1 <sup>S452-587</sup> -FKBP-mCherry   | pmCherry-N1             | <i>SACMIL</i> (1-451): <i>FKBP1A</i> (3-108):mCherry                                                               | This study                                     |
| mCherry-FKBP-SAC1 <sup>ΔTMD</sup>        | pmCherry-C1             | mCherry: <i>FKBP1A</i> (3-108):[GGSA],GG: <i>SACMIL</i> (1-521)                                                    | This study                                     |
| mCherry-FKBP-SAC1-HLx2                   | pmCherry-C1             | mCherry: <i>FKBP1A</i> (3-108):[GGSA],GG:: <i>SACMIL</i> (1-520):[EAAAR]:: <i>SACMIL</i> (521-587)                 | This Study                                     |
| mCherry-FKBP-SAC1-HLx4                   | pmCherry-C1             | mCherry: <i>FKBP1A</i> (3-108):[GGSA],GG:: <i>SACMIL</i> (1-520):[EAAAR]:: <i>SACMIL</i> (521-587)                 | This study                                     |
| mCherry-FKBP-SAC1-HLx6                   | pmCherry-C1             | mCherry: <i>FKBP1A</i> (3-108):[GGSA],GG: <i>SACMIL</i> (1-520):[EAAAR]:: <i>SACMIL</i> (521-587)                  | This study                                     |
| mCherry-FKBP-SAC1-HLx8                   | pmCherry-C1             | mCherry: <i>FKBP1A</i> (3-108):[GGSA],GG: <i>SACMIL</i> (1-520):[EAAAR]:: <i>SACMIL</i> (521-587)                  | This study                                     |
| mCherry-FKBP-SAC1-HLx10                  | pmCherry-C1             | mCherry: <i>FKBP1A</i> (3-108):[GGSA],GG: <i>SACMIL</i> (1-520):[EAAAR] <sub>10</sub> :: <i>SACMIL</i> (521-587)   | This study                                     |
| mCherry-FKBP-SAC1 <sup>C389S</sup> -HLx8 | pmCherry-C1             | mCherry: <i>FKBP1A</i> (3-108):[GGSA],GG: <i>SACMIL</i> <sup>C389S</sup> (1-520):[EAAAR]:: <i>SACMIL</i> (521-587) | This study                                     |
| mCherry                                  | pmCherry-C1             | mCherry                                                                                                            | (Hammond et al., 2014)                         |
| mCherry-SAC1                             | pmCherry-C1             | mCherry: <i>SACMIL</i>                                                                                             | (Sohn et al., 2016)                            |
| mCherry-SAC1-HLx8                        | pmCherry-C1             | mCherry: <i>SACMIL</i> (1-520):[EAAAR]:: <i>SACMIL</i> (521-587)                                                   | This study                                     |
| mCherry-SAC1 <sup>C389S</sup> -HLx8      | pmCherry-C1             | mCherry: <i>SACMIL</i> <sup>C389S</sup> (1-520):[EAAAR]:: <i>SACMIL</i> (521-587)                                  | This study                                     |
| mTagBFP2-FKBP-CYB5A <sup>tail</sup>      | pmTagBFP2-C1            | mTagBFP2: <i>FKBP1A</i> (3-108):[GGSA],GG: <i>CYB5A</i> (100-134)                                                  | This study                                     |

1  
2 Table 1 **Plasmids used in this study**. Genes are human unless otherwise stated

3 All plasmids were verified by Sanger sequencing; plasmids generated in this study are  
4 available from Addgene ([www.addgene.org](http://www.addgene.org)). Note, the *SACMIL* gene used in this study

5 and previous publications (Sohn et al., 2016) contains a missense mutation Y433F relative

6 to the human genome reference sequence. However, the short Genetic Variations database

1 (dbSNP) shows that this allele (rs1468542) represents approximately 60% of alleles  
2 present in the human population sampled to date. This allele can therefore be viewed as  
3 "wild-type".

#### 4 *Generation on 293A<sup>GFP1-10</sup> cell line*

5 To create a cell line stably expressing GFP-1-10 for complementation with GFP-11 tags, the  
6 PiggyBac Transposon system was applied via transfection in 293A cells. Cells were seeded  
7 onto 6-well plates and plasmid containing the GFP-1-10 sequence under a CAG promoter  
8 and flanked by the proper inverted terminal repeats (APX1-GFP-1-10) was transfected  
9 along with plasmid coding the PiggyBac Transposase (CDV-hyPBase) (0.7  $\mu$ g and 0.3  $\mu$ g,  
10 respectively) as described above. Following overnight transfection, media was replaced  
11 with fresh growth media and cells were propagated for 1 week to allow dilution of any free  
12 plasmid. 8 independent samples were split in limiting 1:2 dilutions across 12 columns of a  
13 96-well plate. After growth, populations were chosen from the last 4 columns and a sample  
14 of each was screened using an mCherry-SACM1L-GFP-11 reporter plasmid to observe GFP-  
15 complementation and assess the efficiency of GFP-1-10 insertion. The polyclonal population  
16 of a single well that showed >90% GFP complementation of visibly transfected cells was  
17 chosen and propagated for use in future gene-editing experiments (named here as 293A<sup>GFP-</sup>  
18 <sup>1-10</sup>).

#### 19 *Generation of endogenously tagged cell lines*

20 Single-guide RNA (sgRNA) and homologous-directed repair (HDR) template design  
21 followed the method described by (Leonetti et al., 2016), utilizing the published sequences  
22 available for targeting *SEC61B* and *SACM1L*. *ESYT1* sgRNA design was informed by the  
23 published sequence used by (Saheki et al., 2016). All HDR templates included 70 bp  
24 homology-arms and the following GFP-11 and flexible linker sequence for genomic

1 insertion  
2 (CGTGACCACATGGTCCTTCATGAGTATGTAAATGCTGCTGGGATTACAGGTGGCGGC).

3 Single-stranded HDR templates were ordered from IDT as ultramers. ssDNA primers to  
4 serve as templates for sgRNA production were ordered from ThermoFisher. Templates were  
5 made by annealing published primers ML611, T25 and BS7 with each site-specific primer  
6 following the procedure of Leonetti et al. Annealed products were column purified using  
7 the GeneJet Gel Extraction and DNA Cleanup Micro Kit (Thermo Scientific, #K0832). The  
8 GeneArt Precision gRNA Synthesis Kit (Thermo Fisher Scientific, A29377) was used for in  
9 vitro transcription of DNA templates to produce column-purified sgRNAs. Purity was  
10 checked by agarose gel electrophoresis. Cas9 Ribonucleoprotein (RNP) formation and  
11 delivery followed the procedure outlined by New England Biolabs  
12 ([https://www.neb.com/protocols/2016/07/26/electroporation-of-cas9-rnp-](https://www.neb.com/protocols/2016/07/26/electroporation-of-cas9-rnp-ribonucleoprotein-into-adherent-cells-using-the-neon-electroporation)  
13 [ribonucleoprotein-into-adherent-cells-using-the-neon-electroporation](https://www.neb.com/protocols/2016/07/26/electroporation-of-cas9-rnp-ribonucleoprotein-into-adherent-cells-using-the-neon-electroporation)). 2.1 $\mu$ L of GeneArt  
14 Platinum Cas9 Nuclease (ThermoFisher, B25640) was incubated with 0.5  $\mu$ L sgRNA (~10  
15  $\mu$ M) in Buffer R of the Neon Electroporation System (ThermoFisher, MPK1025) at room  
16 temperature for 20min to form Cas9 RNP complexes. Meanwhile 293A<sup>GFP-1-10</sup> cells were  
17 prepared from 90% confluent T75 culture flasks to obtain 1-2x10<sup>6</sup> cells suspended in 50  $\mu$ L  
18 Buffer R. 2  $\mu$ L of HDR template (100mM) was then added to the incubating RNPs. 5  $\mu$ L of  
19 the prepared cells were then added to the RNP incubation tubes, and 10 $\mu$ L of this mixture  
20 was aspirated with the Neon pipette and electroporated (1500 V, 20 ms, 1 pulse). Contents  
21 of the Neon tip were then immediately transferred to a single well of a 6-well plate  
22 containing 2 mL of pre-warmed antibiotic-free complete DMEM and allowed to recover.  
23 After recovery and growth, electroporated cells were screened with confocal microscopy.  
24 Populations containing correctly edited cells were enriched by fluorescence-activated cells  
25 sorting using a Rheum Aria sorter (University of Pittsburgh Flow Cytometry Core). After

1 sorting, genomic DNA was isolated using the PureLink Genomic DNA Mini Kit  
2 (ThermoFisher K1820-01). A standard GFP-11 forward primer and gene-specific reverse  
3 primers were used to compare the presence of ~200 bp amplicons from each edited cell line  
4 to the non-edited 293A<sup>GFP-1-10</sup> cells. Additionally, using gene-specific primers ~75 bp  
5 upstream of the GFP-11 insertions, amplicons were produced and sequenced with the GFP-  
6 11 forward primer to ensure correct in-frame addition of the cassettes.

### 7 *Fluorescence microscopy*

8 For imaging, cells were placed in complete imaging medium consisting of Fluorobrite  
9 DMEM (ThermoFisher, A1896702), 10% heat-inactivated fetal bovine serum, 0.1%  
10 chemically-defined lipid supplement, 2 mM Glutamax (ThermoFisher 35050061) and 25  
11 mM NaHEPES, pH 7.4. Where indicated, cells were stained with 1  $\mu$ g/ml CellMask deep red  
12 in this medium for 3 minutes before exchanging for fresh media. For experiments in Figure  
13 3, serum was omitted from the media. Cells were imaged on a Nikon Eclipse TiE inverted  
14 microscope using a 100x, plan apochromatic, 1.45 NA oil-immersion objective lens (Nikon).  
15 Excitation in either imaging mode was achieved using a dual fiber-coupled LUN-V 4-line  
16 laser launch with 405 nm (for TagBFP2), 488 nm (GFP), 561 nm (mCherry) or 640 nm  
17 (iRFP, CellMask Deep Red) laser lines. Cells were imaged in 2 ml imaging medium, or else  
18 1.6 ml with the addition of 0.4 ml of imaging medium containing five-fold the final  
19 concentration of agonist or inhibitor during time-lapse acquisition, as indicated. A  
20 motorized stage (Nikon) was used to move between up to 16 consecutive positions in the  
21 dish for each time point with high precision. Acquisition was controlled using "Elements"  
22 software (Nikon) and raw data including metadata were saved in "nd2" format.

23 For confocal imaging, a Nikon A1R confocal scan head was used operating in resonant  
24 mode. 8 or 16 scans were integrated to improve signal to noise. To prevent cross-talk

1 between channels, blue (425-475 nm) and yellow/orange (570-620 nm) fluorescence was  
2 acquired on a separate excitation scan to the green (500-550 nm) and far red (663-737  
3 nm) channels. The confocal pinhole was set to 1.2x the size of the Airy disc of far-red  
4 fluors.

5 For TIRF imaging, a TIRF illuminator arm (Nikon) was used to deliver wide-field  
6 illumination at an acute angle. Emission for blue and yellow/orange (420-480 nm & 570-  
7 620 nm) along with green and far red/infrared (505-550 nm & 650-850 nm) was acquired  
8 using dual-pass filters (Chroma), mounted in adjacent positions in a Lamda 10-2 filter  
9 wheel (Sutter). Images were collected with a Zyla 5.5 sCMOS camera (Andor).

## 10 *Data Analysis*

11 Images were imported into the open-access image analysis platform Fiji (Schindelin et al.  
12 2012) for analysis. Quantitative image analysis of multiple positions on the dish was  
13 performed in parallel by first assembling the images from each position into a single  
14 montage, and then generating regions of interest (ROI) of each cell to be analyzed.

15 For analysis of fluorescence intensity changes at the ER or PM from confocal data, images  
16 of the ER (using expressed iRFP-Sec61 $\beta$ ) or the PM (using CellMask deep red) were used to  
17 generate a binary mask through à trous wavelet decomposition (Olivo-Marin 2002) as  
18 described previously (Hammond et al. 2014), using an automated custom-written ImageJ  
19 macro. Firstly, each image in the montage is normalized to the mean pixel intensity of the  
20 cell ROIs, to adjust for differences in expression level. A smoothing filter with a Gaussian  
21 approximation [1/16, 1/4, 3/8, 1/4, 1/16] is applied to the images to be used as the mask  
22 over three progressively larger length scales (s) generating four images:  $I_0 - I_3$  (the original  
23 plus the three smoothed). These images  $I_s$  are used to compute the wavelets of these  
24 images  $W_s = I_s - I_{s-1}$ . After eliminating negative pixel values, these wavelet images  $W_s$  are

1 then multiplied together, resulting in a filtered image. A binary mask is then computed by  
2 thresholding at 3-fold the standard deviation of the filtered image. This mask is used to  
3 measure the fluorescence intensity in the ER or PM for the P4M-labelled images, after  
4 normalizing these to the mean pixel intensity of the cell ROIs (which again adjusts for  
5 differing expression levels between cells).

6 For analysis of the change in fluorescence intensity from TIRF data, images were  
7 background subtracted and then the mean fluorescence intensity was measured for total  
8 cell ROI throughout the time lapse. Images at time  $t$  were normalized to the mean ROI  
9 intensity pre-stimulation, i.e.  $F_t/F_{pre}$ .

10 To calculate the “MCS index”, images were recorded of each cell corresponding to  
11 expression of a GFP test protein, mCherry-MAPPER (as an MCS marker) and iRFP-Sec61 $\beta$   
12 (as an ER marker). For each of these channels, pixel intensity was normalized to the  
13 maximum pixel intensity in a given cell ROI, giving a range from 0 to 1. This results in  
14 normalized images  $I_{MCS}$ ,  $I_{ER}$  and  $I_{test}$ . The differences between test protein and the markers is  
15 then computed, i.e.  $dev_{MCS} = |I_{MCS} - I_{test}|$  and  $dev_{ER} = |I_{ER} - I_{test}|$ . Finally, MCS index was  
16 computed as the difference between ER and MCS deviations,  $MCS\ index = dev_{ER} - dev_{MCS}$ .  
17 Therefore, for MCS-localized test proteins, the deviation from ER was large and the  
18 deviation from MCS small, so MCS index is larger and positive. For ER-localized test  
19 proteins, deviation from MCS is large and from ER is small, giving smaller and more  
20 negative values.

21 Data were exported into Prism 7 (Graphpad) for graphing and statistical analysis. Data  
22 were subject to D’Agostino and Pearson normality tests which showed significant deviation  
23 of the data from Gaussian distributions for every data set. Therefore, we used the non-  
24 parametric Kruskal-Wallis test with appropriate post-hoc tests for multiple comparisons;



1 for two-way ANOVA, data were transformed with the natural logarithm to approximate a  
2 normal distribution.

3 Representative images were selected on the basis of the cells having good signal to noise  
4 and a metric (such as MCS index or change in  $F_v/F_{pre}$ ) close to the median. Linear  
5 adjustments to the displayed dynamic range were performed for clarity. For images  
6 showing  $F_v/F_{pre}$ , an average intensity projection of the pre-bleach frames was used to  
7 normalize the entire time-lapse; pixels outside the ROI were set to zero (since background  
8 was divided by background and has a signal  $\sim 1$ ). All images are thus shown at the same  
9 intensity scale of 0.3-1.1 and are directly comparable.

## 10 **Results**

### 11 *Evidence for a “cis” acting SAC1*

12 Loss of SAC1 “trans” activity would cause accumulation of its PtdIns4P substrate in  
13 membranes like the PM and Golgi where the lipid is synthesized, whereas loss of “cis”  
14 activity predicts accumulation of PtdIns4P in the ER (**figure 1D**). *Saccharomyces cerevisiae*  
15 with deletions of their *Sac1* gene show 6-10 fold increases in PtdIns4P mass (Rivas et al.;  
16 Hughes et al., 2000; Guo et al., 1999), with PtdIns4P reported at both the PM (Roy and  
17 Levine, 2004; Stefan et al., 2011) and the ER (Roy and Levine, 2004; Tahirovic et al.,  
18 2005; Cai et al., 2014), depending on the probe used. RNAi of SAC1 in mammalian causes  
19 1-2 fold accumulation of PtdIns4P (Cheong et al., 2010; Dickson et al., 2016; Goto et al.,  
20 2016), with accumulation reported in the ER (Cheong et al., 2010; Blagoveshchenskaya et  
21 al., 2008). On the other hand, acute knock-out of SAC1 in HeLa cells with CRISPR/Cas9  
22 was reported to induce PtdIns4P accumulation on the PM and endosomes (Dong et al.,  
23 2016). However, these experiments are hard to interpret, since the *SAC1* gene is essential

1 to the survival of single mammalian cells (Blomen et al., 2015; Wang et al., 2015; Liu et al.,  
2 2008). Phenotypes in RNAi and knock-out experiments are therefore observed during the  
3 rundown of SAC1 protein levels before the cells die. The phenotype observed may thus be  
4 exquisitely sensitive to the precise amount of SAC1 protein remaining in the cell at the time  
5 of the experiment.

6 As an alternative approach, we exploited acute chemical inhibition of SAC1. As a member  
7 of an especially redox-sensitive family of lipid phosphatases, SAC1 is inherently sensitive to  
8 inhibition by oxidizing compounds including bis-peroxovanadates (bpVs) and hydrogen  
9 peroxide (Rosivatz et al., 2006; Ross et al., 2007). In fact, treatment of cells with 500  $\mu$ M  
10 peroxide was shown to induce a massive 7-fold accumulation of PtdIns4P in mammalian  
11 cells (Ross et al., 2007). We therefore sought to determine where such PtdIns4P  
12 accumulations occur, using our unbiased probe GFP-P4M that detects all cellular pools of  
13 PtdIns4P (Hammond and Balla, 2015; Hammond et al., 2014).

14 Firstly, we wanted to verify that bpVs and peroxide would inhibit SAC1 in the reducing  
15 environment of a living cell's cytoplasm (**Figure 1A**). To this end, we over-expressed a  
16 soluble SAC1 fragment missing the C-terminal transmembrane domain ( $\Delta$ TMD). SAC1 <sup>$\Delta$ TMD</sup>  
17 expression in COS-7 cells greatly reduced PM localization of P4M, indicating PtdIns4P was  
18 depleted, whereas a catalytically inactive C389S mutant was without effect (**Figure 1B**).  
19 Acute treatment of these cells with 500  $\mu$ M peroxide led to a rapid (< 1 minute) recovery  
20 of PM PtdIns4P, followed by an accumulation of P4M internally (see following paragraph  
21 for an explanation); treatment with 10  $\mu$ M bpV(HOpic) caused a somewhat slower recovery  
22 of PM PtdIns4P over approximately 5 min (**Figure 1C**). Clearly, the over-expressed  
23 SAC1 <sup>$\Delta$ TMD</sup> could be inhibited in the context of a living cell.

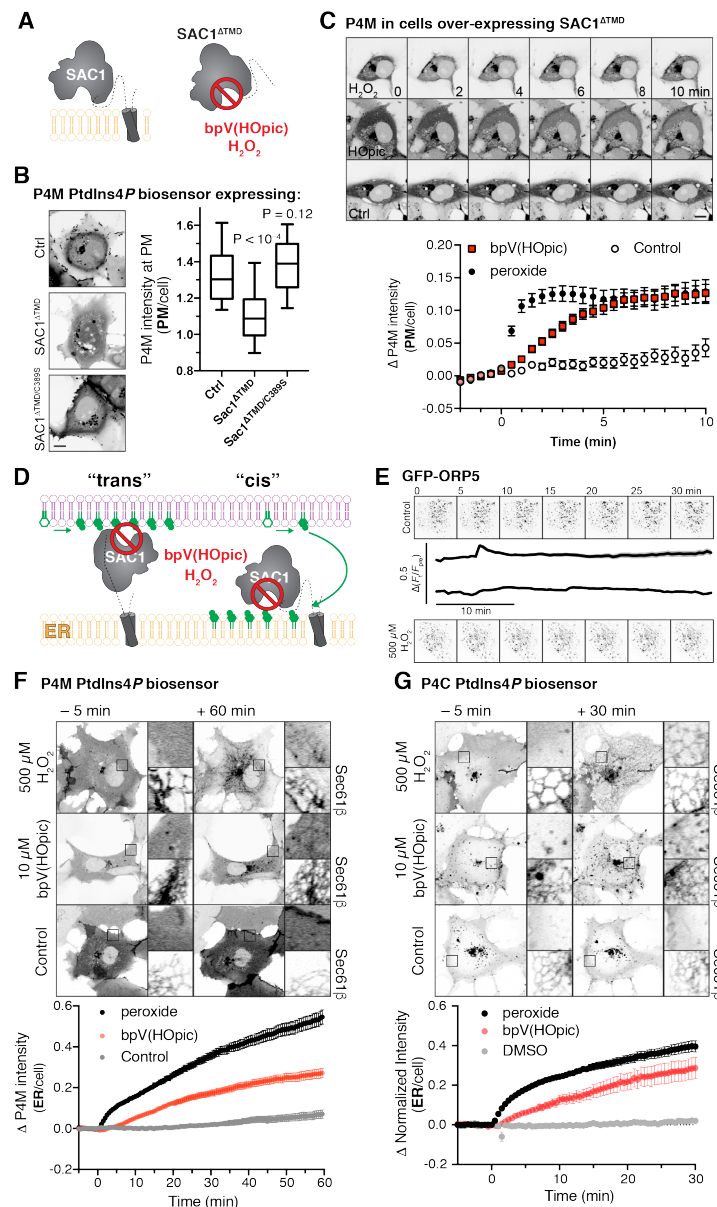

1  
2 **Figure 1 Inhibition of SAC1 causes PtdIns4P accumulation in the ER.** (A) A soluble fragment of SAC1  
3 (SAC1<sup>ΔTMD</sup>) is inhibited by peroxide and bpV(HOpic). (B). SAC1 expression depletes PM PtdIns4P. COS-7  
4 cells transfected with GFP-P4M and either FKBP-mCherry (Ctrl), SAC1<sup>ΔTMD</sup>-FKBP-mCherry or catalytically  
5 inactive SAC1<sup>ΔTMD/C389S</sup>-FKBP-mCherry were imaged live by confocal microscopy. Representative images are  
6 shown (bar = 10 μm). The graph shows P4M intensity at the plasma membrane (defined by CellMask deep  
7 red dye) normalized to total cell intensity; box and whisker plot shows quartiles and 5-95 percentiles of 90  
8 cells from three independent experiments. *P* values derive from Dunn's multiple comparison test compared to  
9 Ctrl after a Kruskal-Wallis test ( $P < 10^{-4}$ ). (C). **Peroxide and bpV(HOpic) inhibit SAC1 in live cells.** COS-7  
10 cells were transfected with P4M and SAC1<sup>ΔTMD</sup> as in B and imaged by time-lapse confocal microscopy. 500 μM  
11 peroxide or 10 μM bpV(HOpic) were added at time 0. P4M intensity was quantified as in B. Data are means ±  
12 s.e. of 44 or 45 cells from four independent experiments. Scale bar = 10 μm. (D) **Predicted PtdIns4P**  
13 **accumulation for "cis" and "trans" operation of SAC1.** (E) **peroxide does not disrupt ORP5 localization**  
14 **at ER-PM MCS.** Images show TIRF images of COS-7 cells expressing GFP-ORP5 at the indicated times. Traces  
15 are means with s.e. shaded for 31-32 cells from three independent experiments. (F-G). **SAC1 inhibitors**  
16 **cause PtdIns4P accumulation in the ER.** Time-lapse images of representative COS-7 cells expressing GFP-  
17 P4M (F) or GFP-P4C (G) and treated with inhibitors at time 0. The insets are 10 μm squares, and are  
18 expanded at right and show PtdIns4P accumulation relative to a co-expressed ER marker, iRFP-Sec61β.  
19 Graphs show P4M intensity at the ER (defined by iRFP-Sec61β) normalized to total cell intensity; data are  
20 means ± s.e. of 38-41 (F) or 29-30 (G) cells from three (G) or four (F) independent experiments.

1 Inhibition of SAC1 with these oxidative stress-inducing compounds is likely to induce an  
2 ER-stress response, which could potentially lead to disrupted ER-PM MCS (van Vliet et al.,  
3 2017). However, under our experimental conditions, ER-PM MCS marked with GFP-ORP5  
4 (that would be responsible for PtdIns4P traffic) were unaffected by peroxide treatment  
5 (**Figure 1E**).

6 We then sought to inhibit endogenous SAC1 with these compounds. Cells were treated with  
7 peroxide or bpV(HOpic) for one hour, which stimulated a rapid (commencing within 5  
8 minutes) accumulation of ER PtdIns4P with peroxide and a slower, but robust  
9 accumulation in the ER with bpV(HOpic) (**Figure 1F**). ER localization of the accumulated  
10 PtdIns4P pool was verified by co-expression with iRFP-tagged Sec61 $\beta$  (**Figure 1F**). We  
11 observed a similar accumulation of ER-signal with a second, high affinity PtdIns4P  
12 biosensor GFP-P4C (Weber et al., 2014) as shown in **Figure 1G**. The rapid accumulation at  
13 the ER explains the internal accumulation seen in SAC1<sup>ΔTMD</sup> over-expressing cells in **Figure**  
14 **1B**. The most parsimonious explanation for these data is that upon acute inhibition of  
15 SAC1, transfer of PtdIns4P to the ER continues, but SAC1 is unable to dephosphorylate it,  
16 leading to massive accumulation of the lipid in this compartment (Ross et al., 2007). These  
17 data are therefore consistent with previous observations (Cheong et al., 2010;  
18 Blagoveshchenskaya et al., 2008) that SAC1 exhibits “cis” activity in the ER of mammalian  
19 cells, though they do not rule out the occurrence of additional “trans” activity *a priori*.

## 20 *SAC1 does not enrich at ER-PM MCS*

21 Dynamic recruitment of SAC1 to ER-PM MCS was recently proposed as a mechanism to  
22 modulate “trans” activity of the enzyme (Dickson et al., 2016). Although this is not  
23 inconsistent with the firmly established localization of SAC1 throughout the ER (Rohde et  
24 al., 2003; Nemoto et al., 2000), most proteins known to function at MCS are enriched at

1 them too (Gatta and Levine, 2017). Therefore, a clue as to SAC1's preferred mode of  
2 activity may be gleaned from a careful analysis of its enrichment (or lack of enrichment) at  
3 MCS.

4 We attempted to use immunofluorescence to localize SAC1, though we failed to identify  
5 conditions whereby ER morphology was well enough preserved and specific antibody signal  
6 was strong enough to localize SAC1 at high resolution. Instead, we turned to gene editing  
7 technology to tag the endogenous SAC1 gene, specifically using a "split GFP" approach  
8 (Cabantous et al., 2004; Leonetti et al., 2016; **Figure 2A**). We engineered an HEK-293A  
9 cell line to stably over-express GFP1-10 (designated 293A<sup>GFP1-10</sup> cells from hereon). We then  
10 edited these cells to introduce the GFP11 tag to the N-termini of either the SAC1 protein,  
11 the ER-resident Sec61 $\beta$  or the MCS protein Extended Synaptotagmin 1, E-Syt1 (Giordano et  
12 al., 2013). Genotyping was performed in edited cells using GFP11-specific forward primers  
13 and reverse primers corresponding to a ~200 bp upstream region in exon 1. In each case,  
14 the predicted 200 bp amplicon was produced in the edited cells but not in the un-edited  
15 293A<sup>GFP1-10</sup> cells (**Figure 2B**), though we did observe some longer non-specific PCR  
16 products. Sanger sequencing of amplicons spanning the edited site in each case was  
17 accomplished with GFP11 primers to verify insertion of the tag in frame.

18 Confocal imaging revealed the expected ER/Golgi localization of GFP11-SAC1 in edited  
19 cells, showing co-localization with the ER marker VAPB and the cis/medial Golgi marker  
20 Mannosidase II (**Figure 2C**). Medial confocal optical sections of GFP11-E-Syt1 and GFP-11-  
21 Sec61 $\beta$  also revealed exclusively ER localization (**Figure 2C**), consistent with previous  
22 reports (Saheki et al., 2016; Leonetti et al., 2016). To look for ER-PM MCS, we used total  
23 internal reflection fluorescence (TIRF) microscopy. Like GFP11-Sec61 $\beta$ , GFP11-SAC1  
24 exhibited a reticular distribution, though unlike Sec61 $\beta$ , it also showed juxta-nuclear

1 enrichment likely corresponding to the bottom of the Golgi (**Figure 2D**). GFP11-E-Syt1 also  
2 revealed a reticular distribution by TIRF, but with numerous bright puncta that are most  
3 likely ER-PM MCS (**Figure 2D**). Quantitative analysis of the ratio of fluorescence intensity  
4 via TIRF imaging (selective for signal within  $\sim 100$  nm of the coverslip) vs conventional epi-  
5 illumination (exciting fluorescence throughout the entire volume of the cell) revealed no  
6 enrichment of GFP11-SAC1 close to the basal PM as compared to ER-localized GFP11-  
7 Sec61 $\beta$ , whereas GFP11-E-Syt1 showed a marked enrichment (**Figure 2D**). So, it appeared  
8 we could not detect enrichment of SAC1 at ER-PM MCS.

9 To produce a more quantitative, rigorous comparison of MCS vs non-MCS localization of  
10 SAC1, we turned to expression of GFP-SAC1 in COS-7 cells, since expressed SAC1 exhibits  
11 an identical localization to the endogenous protein (Rohde et al., 2003). We expressed  
12 GFP-SAC1 along with GFP-ORP5 (Chung et al., 2015), GFP-E-Syt2 (Giordano et al., 2013)  
13 and MAPPER (Chang et al., 2013) as positive controls for proteins that localize to ER-PM  
14 MCS, along with GFP-calreticulin and GFP-Sec61 $\beta$  as negative controls. For each protein,  
15 we co-expressed mCherry-MAPPER as a marker for MCS and iRFP-Sec61 $\beta$  to label the total  
16 ER. After acquiring TIRF images of the cells, we background-subtracted the images and  
17 compared co-localization of the test protein to both Sec61 $\beta$  and MAPPER to give an “MCS  
18 index” (see Methods). **Figure 2E** shows results from 90 cells across three independent  
19 experiments, along with representative images (selected on the basis of values close to the  
20 median). As can be seen, GFP-SAC1 localizes to the total ER with a distribution  
21 indistinguishable from calreticulin or Sec61 $\beta$ , whereas the contact site proteins all exhibit  
22 punctate distributions coinciding with MAPPER, although the association between MAPPER  
23 and E-Syt2 is not as tight as it is with ORP5 (**Figure 2E**). Collectively, these data show that,  
24 in the resting state, SAC1 does not specifically localize at ER-PM MCS.



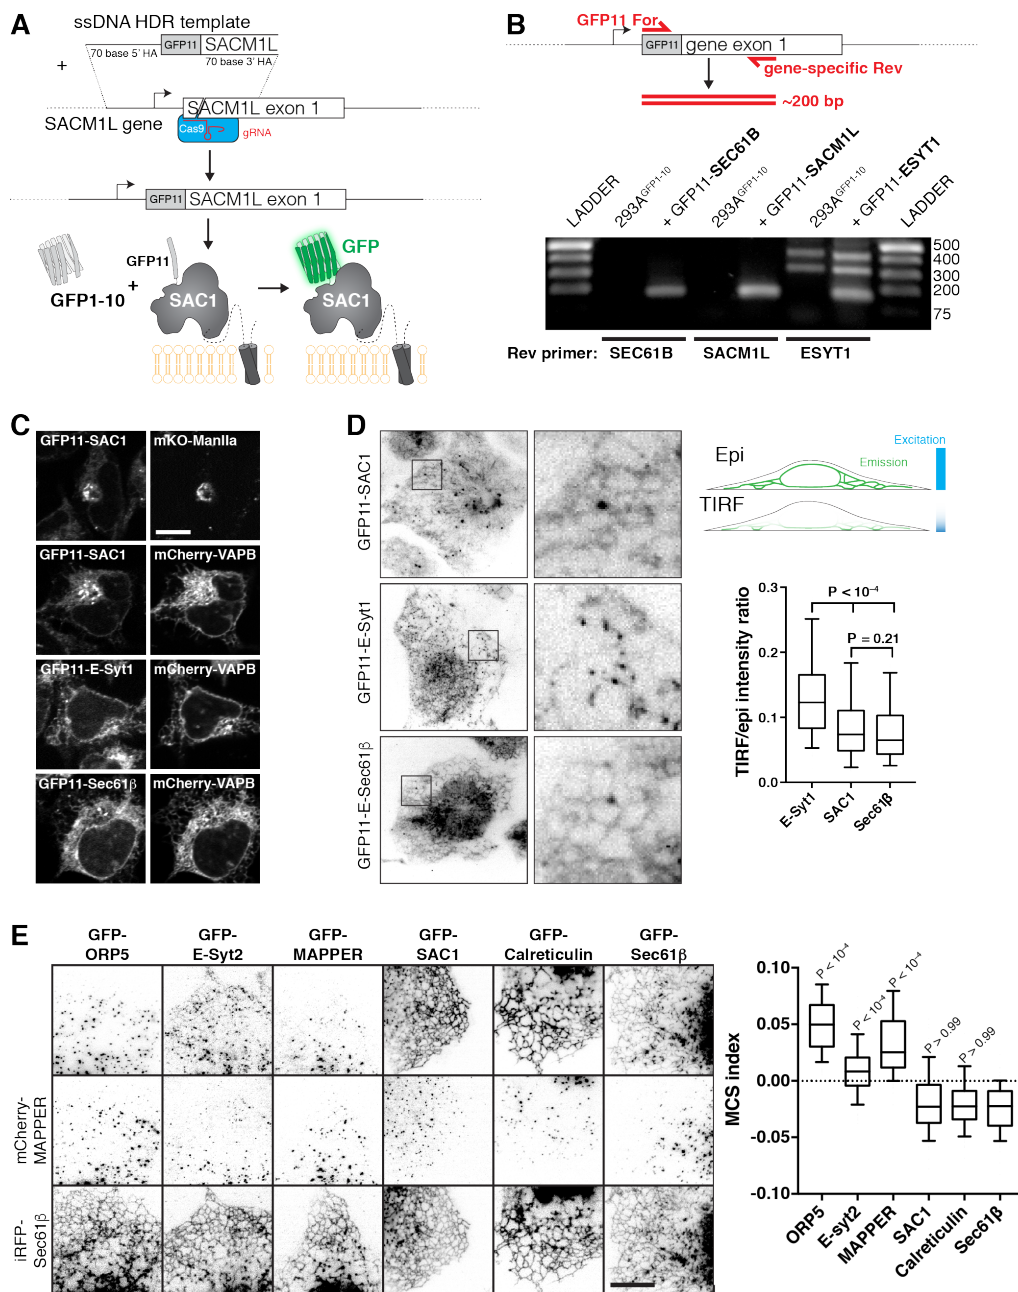

1 **Figure 2 Localization of SAC1 relative to ER-PM MCS and ER proteins. (A) Strategy for tagging**  
 2 **endogenous SAC1:** a guide RNA is complexed with Cas9 protein and electroplated into HEK-293A cells with  
 3 a short single-stranded homology-directed repair (HDR) template. This adds a short tag encoding the 11th  
 4 strand of the GFP beta barrel. When expressed, this strand assembles with co-expressed GFP1-10 to make  
 5 functional GFP. **(B) Specificity of genomic tagging.** 293A cells stably over-expressing GFP1-10 and edited  
 6 with the indicated GFP11 tags were genotyped with GFP11 specific forward primers and a gene-specific  
 7 reverse primer located ~200 bp downstream in exon 1. **(C) Confocal images of GFP11 gene edited cells** co-  
 8 expressing mKO-Manosidase II as a cis/medial Golgi marker, or mCherry-VAPB as an ER marker. **(D) E-Syt-1**  
 9 **shows enrichment at the PM relative to SAC1 and Sec61β.** Cells were imaged in both TIRF and epi-  
 10 illumination, and the fluorescence intensity ratio of the two images was calculated. Boxes represent quartiles,  
 11 whiskers 5-95 percentile. P values are from Dunn's Multiple Comparisons following a Kruskal-Wallis test ( $P <$   
 12  $10^{-4}$ ). Data are from 180 (E-Syt1), 234 (SAC1) or 246 (Sec61β) cells imaged across five independent  
 13 experiments. Insets = 10  $\mu$ m. **(E) Expressed SAC1 is not enriched at ER-PM MCS in COS-7 cells.** TIRF  
 14 images of COS-7 cells transfected for 24 hours with the indicated GFP-tagged plasmid and mCherry-MAPPER  
 15 to label ER-PM MCS along with iRFP-Sec61β to label total ER. Scale bar = 10  $\mu$ m. The MCS index is the  
 16 "difference of differences" between GFP and iRFP-Sec61β as well as GFP and MAPPER signals. P values are  
 17 from Dunn's Multiple Comparison test relative to GFP-Sec61β, run as a post-hoc to a Kruskal-Wallis test ( $P <$   
 18  $10^{-4}$ ). Box and whiskers are quartiles with 10-90 percentiles of 90 (Sec61β), 92 (Calreticulin), 91 (SAC1), 93  
 19 (MAPPER) or 92 (E-Syt2, ORP5) cells imaged across three independent experiments.

1 Dynamic recruitment of SAC1 to ER-PM MCS has been proposed as a mechanism by which  
2 cells can modulate SAC1 “trans” activity and thereby PM inositol lipid abundance (Dickson  
3 et al., 2016). We therefore used time-lapse TIRF microscopy to follow the dynamic  
4 recruitment of ER-resident proteins to MCS during stimulation of cells with phospholipase  
5 C (PLC) coupled agonists. PLC induces the hydrolysis of PM PtdIns(4,5) $P_2$  to produce the  
6 calcium-mobilizing messenger, Ins $P_3$ . The resulting calcium release from ER stores triggers  
7 transient recruitment of E-Syt1 to ER-PM MCS (Giordano et al., 2013), which may facilitate  
8 early re-synthesis of inositol lipid (Saheki et al., 2016). Subsequently, calcium release leads  
9 to depletion of ER calcium, triggering aggregation of the ER calcium sensor STIM1 and its  
10 recruitment to ER-PM MCS to activate store-operated calcium entry across the PM (Liou et  
11 al., 2005). Finally, the continued breakdown of PtdIns(4,5) $P_2$  yields diacylglycerol, which is  
12 converted to phosphatidic acid and exchanged for ER-derived PtdIns by MCS-recruited  
13 Nir2, facilitating PtdIns(4,5) $P_2$  replenishment (Chang et al., 2013; Kim et al., 2015). We  
14 expressed GFP-tagged ER and MCS proteins in COS-7 cells for six hours in order to achieve  
15 low levels of expression (**Figure 3A**). Stimulation of endogenous PLC-coupled P2Y  
16 receptors (Hughes et al., 2007) with 100  $\mu$ M ATP triggered GFP-E-Syt1 to rapidly (peaking  
17 within 30 s) and transiently (returning to baseline within 2 min) recruit to punctate ER-PM  
18 MCS, whereas STIM1 exhibited a slower (peaking within 2 min) transient recruitment.  
19 GFP-Nir2 exhibited a much slower (5 min) recruitment that was sustained during the 10  
20 min experiment. GFP-SAC1, on the other hand, showed no change in its localization close  
21 to the PM, nor did the ER-resident proteins GFP-calreticulin or GFP-Sec61 $\beta$  (**Figure 3A**).



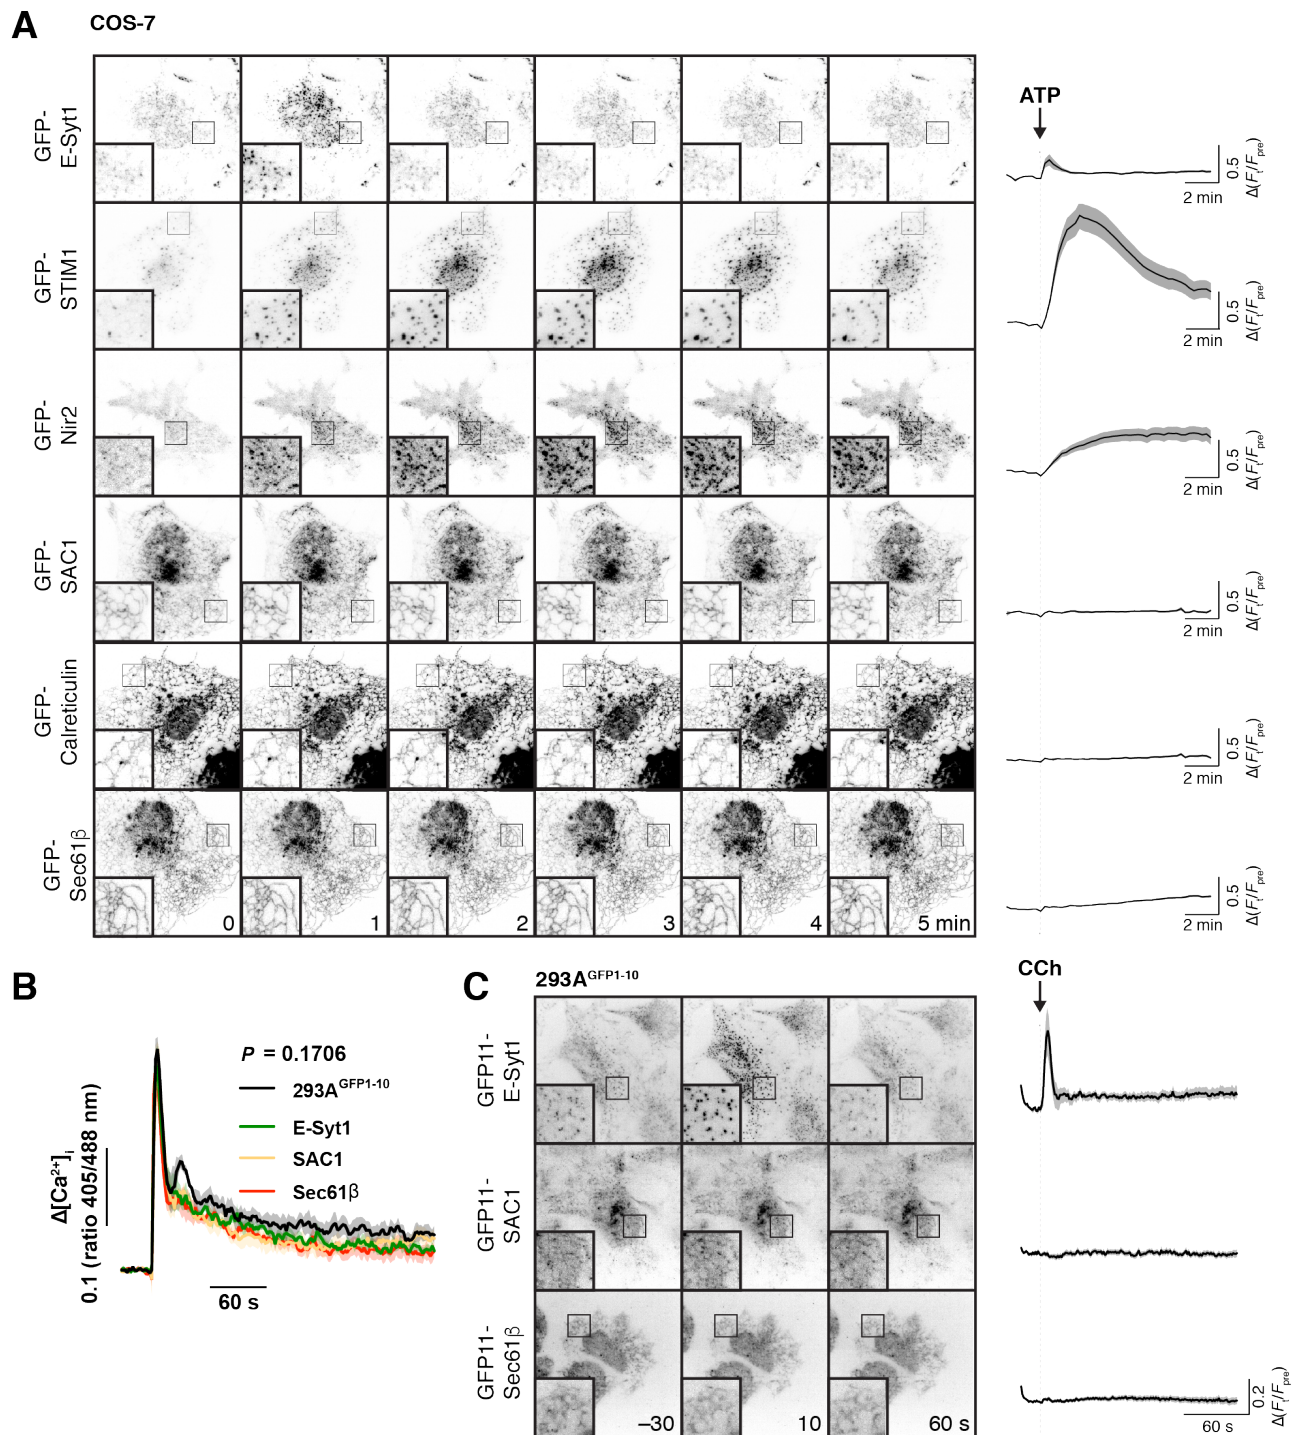

1  
2 **Figure 3 Recruitment of proteins to ER-PM MCS (A).** Transfected SAC1 does not dynamically re-  
3 distribute to ER-PM MCS in COS-7 cells. Time-lapse TIRF microscopy of COS-7 cells transfected with the  
4 indicated GFP-tagged proteins for 6-7 hours. Cells were stimulated with 100  $\mu$ M ATP as indicated. Insets = 10  
5  $\mu$ m. The traces at right show  $\Delta(F_i/F_{pre})$  and are means  $\pm$  s.e. of 30 (Sec61 $\beta$ , SAC1, Calreticulin), 27 (STIM1),  
6 29 (ESyt1) or 20 (Nir2) cells imaged across three independent experiments. **(B) Gene edited alleles do not**  
7 **perturb calcium signals.** Edited 293A<sup>GFP1-10</sup> cells were loaded with Fura-red and the ratio of fluorescence  
8 intensity with respect to 405 and 488 nm excitation was measured. Cells were stimulated with carbachol  
9 (CCh) at 30 s to activate phospholipase C signaling. Data are grand means of four experiments (shaded  
10 regions represent s.e.). The P value represents results of a two-way ANOVA comparing cell lines. **(C)**  
11 **Endogenous SAC1 does not recruit to ER-PM contact sites in 293A<sup>GFP1-10</sup> cells.** Images show representative  
12 gene-edited cells at the indicated times during time-lapse TIRF imaging. Carbachol was added to stimulate  
13 phospholipase C signaling time 0. Images are averages of 5 frames acquired over 10 s to improve signal to  
14 noise. Traces represent mean change in fluorescence intensity (normalized to pre-stimulation levels) with s.e.  
15 of 40 (E-Syt1), 38 (SAC1) or 37 (Sec61 $\beta$ ) cells imaged across five independent experiments.

1 We also checked for transient re-localization of SAC1 in our endogenous labelled 293A<sup>GFP1-10</sup>  
2 cells. In this case, stimulation with 100  $\mu$ M carbachol was used to stimulate PLC via  
3 endogenously expressed muscarinic M3 receptors (Luo et al., 2008). Carbachol elicited a  
4 typical, transient elevation of cytosolic calcium (measured with Fura-red) with a sustained  
5 plateau that was unchanged by tagging endogenous proteins with GFP11 (**Figure 3B**).  
6 Stimulation caused the rapid, transient recruitment of GFP11-E-Syt1 to puncta (**Figure 3C**),  
7 as seen previously with endogenously tagged GFP-E-Syt1 in HeLa cells (Saheki et al.,  
8 2016). However, no change in the localization of endogenous GFP11-SAC1 or GFP11-  
9 Sec61 $\beta$  was observed (**Figure 3C**).

10 Together, these results show that SAC1 is not specifically enriched at (nor depleted from)  
11 ER-PM MCS, even when other proteins are being recruited to these sites to facilitate  
12 calcium and inositol lipid homeostasis. The limited and unchanging localization of SAC1 at  
13 MCS therefore appears co-incidental with its well-known distribution throughout the ER.

#### 14 *“Cis” and “trans” activity of SAC1 in cells*

15 Although the data presented so far failed to show compelling evidence for “trans” activity of  
16 SAC1, neither could we completely exclude it. Notably, SAC1 was not excluded from ER-  
17 PM MCS, so the possibility remained that SAC1 may, given the right circumstances, be able  
18 to operate in a “trans” configuration at MCS. We decided to devise experiments to deduce  
19 whether such activity is possible in living cells.

20 To this end, we designed a strategy utilizing chemically-induced dimerization of FK506-  
21 binding protein (FKBP12) and the FKBP and rapamycin binding (FRB) domain of mTOR  
22 (Ho et al., 1996). PM-anchored FKBP and ER-anchored FRB can be induced to form ectopic  
23 ER-PM MCS using this system (Várnai et al., 2007), so we reasoned this approach could be  
24 used to target SAC1 to ER-PM MCS and assay for “trans” activity (**Figure 4A**). Likewise,

1 “cis” activity could be tested simply by replacing the C-terminal TMDs with FKBP (**Figure**  
2 **4A**), similarly to how the enzyme has been introduced in vitro (von Filseck et al., 2015b;  
3 Stefan et al., 2011; Mesmin et al., 2013). A caveat to this approach was that we had  
4 already found that expressing SAC1<sup>ΔTMD</sup>-FKBP leads to reduced PM PtdIns4P, preventing us  
5 from measuring further PtdIns4P hydrolysis with our GFP-P4M biosensor (**Figure 1A**). To  
6 circumvent this, we turned to a higher-avidity tandem dimer of this domain, GFP-P4Mx2  
7 (Hammond et al., 2014; Levin et al., 2016). This reporter was able to detect residual  
8 PtdIns4P in the PM of SAC1<sup>ΔTMD</sup>-FKBP over-expressing COS-7 cells (**Figure 4B**), allowing us  
9 to assay for recruitment-induced PtdIns4P depletion.

10 The results of these experiments are presented in **Figure 4C**. Overall, there were substantial  
11 differences in PM PtdIns4P changes reported by GFP-P4Mx2 depending on the SAC1  
12 chimera used ( $P < 10^{-4}$ , repeated-measures two-way ANOVA). A fusion of FKBP to the N-  
13 terminus of SAC1 showed robust recruitment of the enzyme to ER-PM MCS within 1  
14 minute of rapamycin addition (see the inset graphs), and we detected a very subtle decline  
15 of PM PtdIns4P as compared to the catalytically inactive C389S control, though this did not  
16 reach statistical significance ( $P = 0.15$ , Tukey's multiple comparison test). Fusion of FKBP  
17 to the C-terminus of the protein produced a greater depletion of PtdIns4P relative to its  
18 C389S control ( $P = 0.007$ ), perhaps because this C-terminal fusion could pull the catalytic  
19 domain closer to the PM after complex formation. Therefore, we could induce a very  
20 limited “trans” activity of over-expressed SAC1.

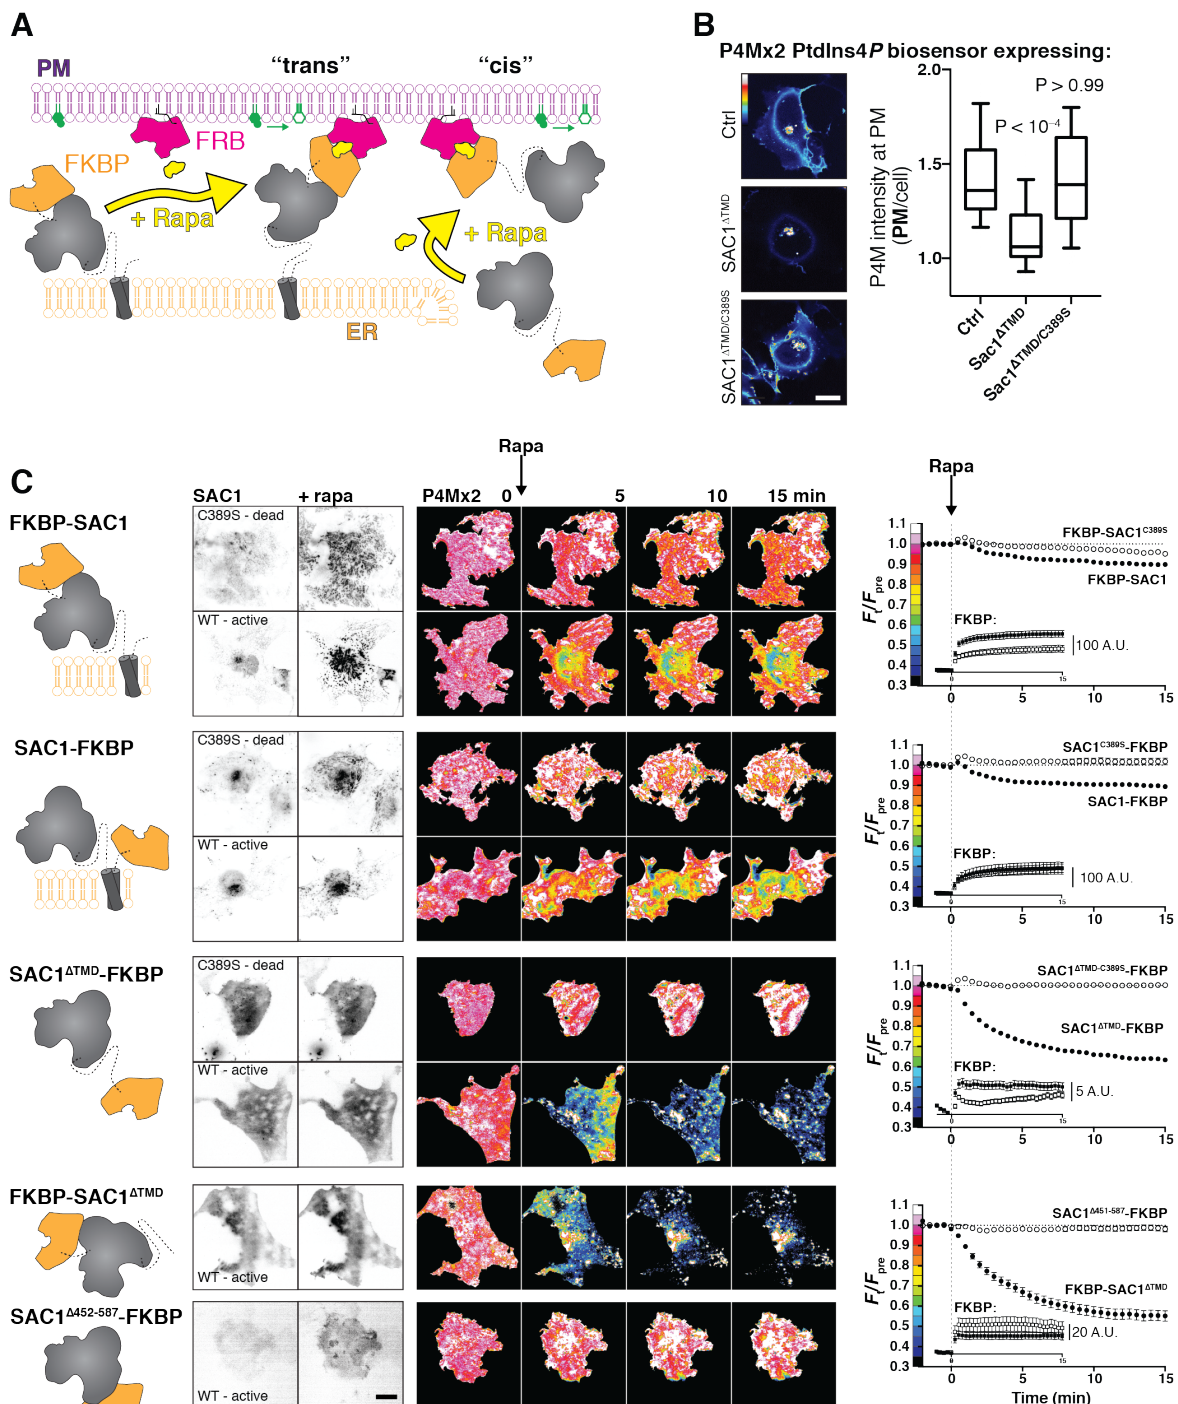

**Figure 4** SAC1 is much more active at the PM in “cis”. (A) Strategy to recruit SAC1 to the PM in “cis” or “trans” using the FRB/FKBP12 heterodimerization system. (B) PM PtdIns4P is still detectable at the PM with P4Mx2 after transfection with SAC1<sup>ΔTMD</sup>. COS-7 cells transfected with GFP-P4M and either FKBP-mCherry (Ctrl), SAC1<sup>ΔTMD</sup>-FKBP-mCherry or catalytically inactive SAC1<sup>ΔTMD/C389S</sup> were imaged live by confocal microscopy. Representative images are shown (bar = 20 μm). The graph shows P4M intensity at the plasma membrane (defined by CellMask deep red dye) normalized to total cell intensity; box and whisker plot shows quartiles and 5-95 percentiles of 90 cells from three independent experiments. P values derive from Dunn's multiple comparison test compared to Ctrl after a Kruskal-Wallis test ( $P < 10^{-4}$ ). (C). **Recruitment of SAC1 to the PM in “cis” is far more effective in depleting PtdIns4P than it is in “trans”.** TIRF images of COS-7 cells transfected with a Lyn<sub>11</sub>-FRB-iRFP PM recruiter, the indicated mCherry-tagged SAC1-FKBP or FKBP-SAC1, and GFP-P4Mx2. Graphs show means ± s.e. Images are representative of n cells, x independent experiments: 57, 6 (FKBP-SAC1); 41, 4 (FKBP-SAC1<sup>C389S</sup>); 28, 3 (SAC1-FKBP); 30, 3 (SAC1-FKBP); 57, 6 (SAC1-FKBP); 36, 4 (SAC1-FKBP); 26, 3 (FKBP-SAC1); 29, 3 (SAC1<sup>Δ452-587</sup>). Inset graphs show the raw change in signal intensity for the mCherry-FKBP tagged SAC1 chimeras. Images of GFP-P4Mx2 are normalized to the mean pre-stimulation pixel intensity, i.e.  $F_t/F_{pre}$  with the color coding reflected in the graph y-axis. Scale bar = 20 μm.



1 Replacement of the TMD with FKBP permitted SAC1 recruitment to the PM in a “cis”  
2 configuration. This protein expressed poorly in cells, and recruited much less robustly than  
3 the “trans” acting fusions of full-length SAC1; the insets to the graphs in **Figure 4C** show  
4 the change in absolute gray levels from identical exposures of the mCherry-tagged GFP-  
5 fusions acquired under the same excitation intensity, and therefore represent a relative  
6 indication of the mass of protein recruited. An order of magnitude less SAC1<sup>ΔTMD</sup>-FKBP was  
7 recruited than full-length FKBP-SAC1 or SAC1-FKBP. Nevertheless, recruitment was still  
8 accomplished in < 1 minute, and the effect on PM PtdIns4P was much more dramatic than  
9 seen with either full-length fusion or the catalytically inactive C389S mutant of this  
10 construct ( $P < 10^{-4}$ ). Fusion of FKBP to the N-terminus of SAC1<sup>ΔTMD</sup> produced better  
11 expression and more robust recruitment than the C-terminal fusion, and also a slightly  
12 more efficient depletion of PtdIns4P ( $P = 0.0008$ ), demonstrating that fusion of FKBP to  
13 the N- or C-termini did not disrupt SAC1 activity. Note that with both ΔTMD fusions, the  
14 extent of depletion is most likely an underestimate, since the high avidity P4Mx2 construct  
15 translocates to other PtdIns4P-replete compartments, such as the Golgi and endosomes,  
16 after release from the PM (Levin et al., 2016). Many of these compartments are visible in  
17 the evanescent field of flat COS-7 cells (**Figure 4C**), causing an underestimate in the  
18 depletion of PM PtdIns4P, which is measured from total fluorescence intensity in the  
19 evanescent field.

20 It has previously been reported that the ~70 amino acid region between the N-terminal  
21 catalytic domain and the TMD of SAC1 are essential for substrate recognition and catalysis  
22 (Cai et al., 2014). We tested a similar truncation (removing residues 452-587 including  
23 these 70 amino acids and the TMD) fused C-terminally to FKBP. Although the protein  
24 recruited to the PM robustly, it failed to induce any PtdIns4P depletion (**Figure 4C**),  
25 consistent with the prior study.

1 Collectively, these results demonstrate that SAC1 has very robust activity when it meets its  
2 substrate in a “cis” configuration in the cellular environment, with much less activity in  
3 “trans”. We hypothesized that this could reflect insufficient length of the cytosolic N-  
4 terminal region to orient the catalytic domain for efficient “trans” catalysis. We further  
5 hypothesized that increasing the length between the TMD and the cytosolic domain could  
6 overcome this deficit (**Figure 5A**). To this end, we generated chimeras of our FKBP-SAC1  
7 constructs containing repeats of the helical linker sequence EAAAR (Yan et al., 2007). Each  
8 repeat of this sequence, when forming an  $\alpha$ -helix, should have a length of approximately  
9 75Å; our tandem repeats of (EAAAR)<sub>2-10</sub> (termed HLx2-10) therefore have predicted lengths  
10 of 1.5-7.5 nm.

11 As shown in **Figure 5B** and C, all of these helical linker SAC1 chimeras were efficiently  
12 recruited to ER-PM MCS within 1 min of the addition of rapamycin. Insertion of 2-6 repeats  
13 did not produce a significant enhancement of PM PtdIns4P hydrolysis ( $P \geq 0.44$ , 57 WT or  
14 30 HLxN cells, Tukey’s multiple comparisons test after a repeated measure 2-way ANOVA,  
15  $P < 10^{-4}$ ). However, insertion of 8 helical repeats produced substantial depletion of PM  
16 PtdIns4P after recruitment to ER-PM MCS ( $P < 10^{-4}$ ), which was not enhanced by the  
17 addition of a further 2 helical repeats to produce HLx10 ( $P = 0.96$ , 30 cells each). No  
18 depletion of PtdIns4P was observed with a catalytically inactive C389S mutant SAC1  
19 containing the HLx8 linker ( $P = 0.96$ , 30 cells). Clearly, the addition of between 6 and 7.5  
20 nm of additional linker between the catalytic domain and the TMD endows a robust “trans”  
21 catalytic activity on SAC1.

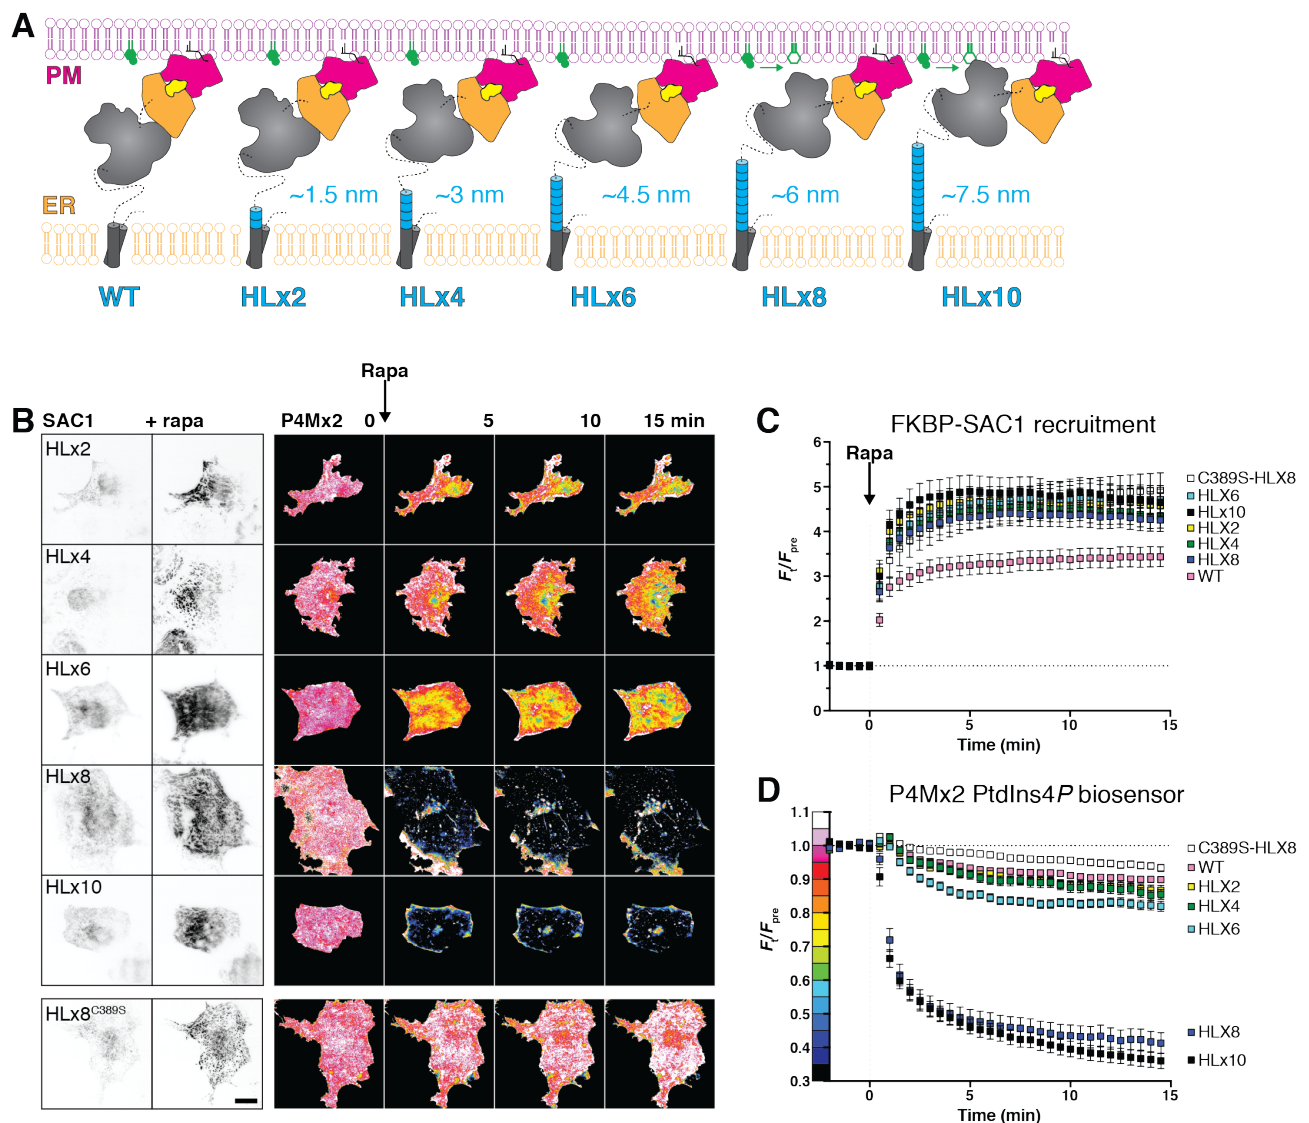

1  
 2 **Figure 5 An extended helical linker confers “trans” activity to SAC1.** (A) Helical linkers (HL) added to  
 3 FKBP-SAC1 at the end of the first transmembrane domain. Each helical repeat consists of the amino acids  
 4 EAAAR, expected to form a helix approximately 0.75 nm long. (B) TIRF imaging of PtdIns4P before and  
 5 after direct recruitment of SAC1 to ER-PM MCS. TIRF images of COS-7 cells transfected with a Lyn<sub>11</sub>-FRB-  
 6 iRFP PM recruiter, the indicated mCherry-tagged SAC1-FKBP and GFP-P4Mx2. Images are representative of  
 7 30 cells from three independent experiments. Images of GFP-P4Mx2 are normalized to the mean pre-  
 8 stimulation pixel intensity, i.e.  $F/F_{pre}$  with the color coding reflected in the graph y-axis of D. Scale bar = 20  
 9  $\mu$ m. (C) Helical linkers do not impair recruitment efficiency of FKBP-SAC1. (D) FKBP-SAC1-HLx8 and -  
 10 HLx10 have “trans” activity. Graphs in C and D show fluorescence intensity in the TIRF footprint of each cell  
 11 for mCherry-tagged FKBP-SAC1 or GFP-tagged P4Mx2, respectively. Data are means  $\pm$  s.e., 30 cells for all  
 12 except WT, with 57 cells. Data for the wild-type FKBP-SAC1 is re-plotted from fig. 4.

13

14 These experiments demonstrated a weak capacity of SAC1 chimeras to act in “trans” when  
 15 they were forced into a conformation spanning the ER-PM junction by heterodimerization.  
 16 This is likely a poor representation of the physiologic state, wherein other proteins would  
 17 mediate ER-PM MCS tethering and SAC1 would not be subject to such conformational

1 constraints. To test for the propensity of SAC1 to act in “trans” at ER-PM MCS under  
2 unconstrained conditions, we capitalized on the observation that extended synaptotagmins  
3 expand MCS when over-expressed (Giordano et al.; Fernández-Busnadiego et al., 2015;  
4 **figure 6A**). These expanded contact sites would be expected to present more endogenous  
5 “trans” acting SAC1 to the plasma membrane, thus depleting PM PtdIns4P (Dickson et al.,  
6 2016). However, we found that expanded ER-PM MCS induced by E-Syt2 over-expression  
7 had no effect on PtdIns4P biosensor localization at the PM (**figure 6B**). In contrast,  
8 extensive depletion was observed after over-expression of ORP5, which is known to deplete  
9 PtdIns4P by transferring it back to the ER (Chung et al., 2015; Sohn et al., 2016).

10 For a more acute interrogation of “trans” activity, we next induced dimerization between  
11 PM targeted FRB and an ER-localized FKBP (fused to the membrane anchor of cytochrome  
12 B5A; Komatsu et al., 2010) to generate new ER-PM MCS (**figure 6A**). These induced  
13 contact sites formed in under a minute at existing ER-PM MCS marked by GFP-E-Syt2 or  
14 GFP-ORP5 (**figure 6C**). In fact, as soon as they formed, the induced contact sites forced E-  
15 Syt2 and ORP5 to the periphery, indicating that the newly formed contacts were too  
16 narrow to accommodate native contact site proteins (**figure 6C**). This “squeezing out” of  
17 the contact site markers was dependent on ER-PM bridging, since GFP-Sec61 $\beta$ , which is not  
18 constrained to the PM-facing side of the ER, was not pushed to the periphery (**figure 6C**).



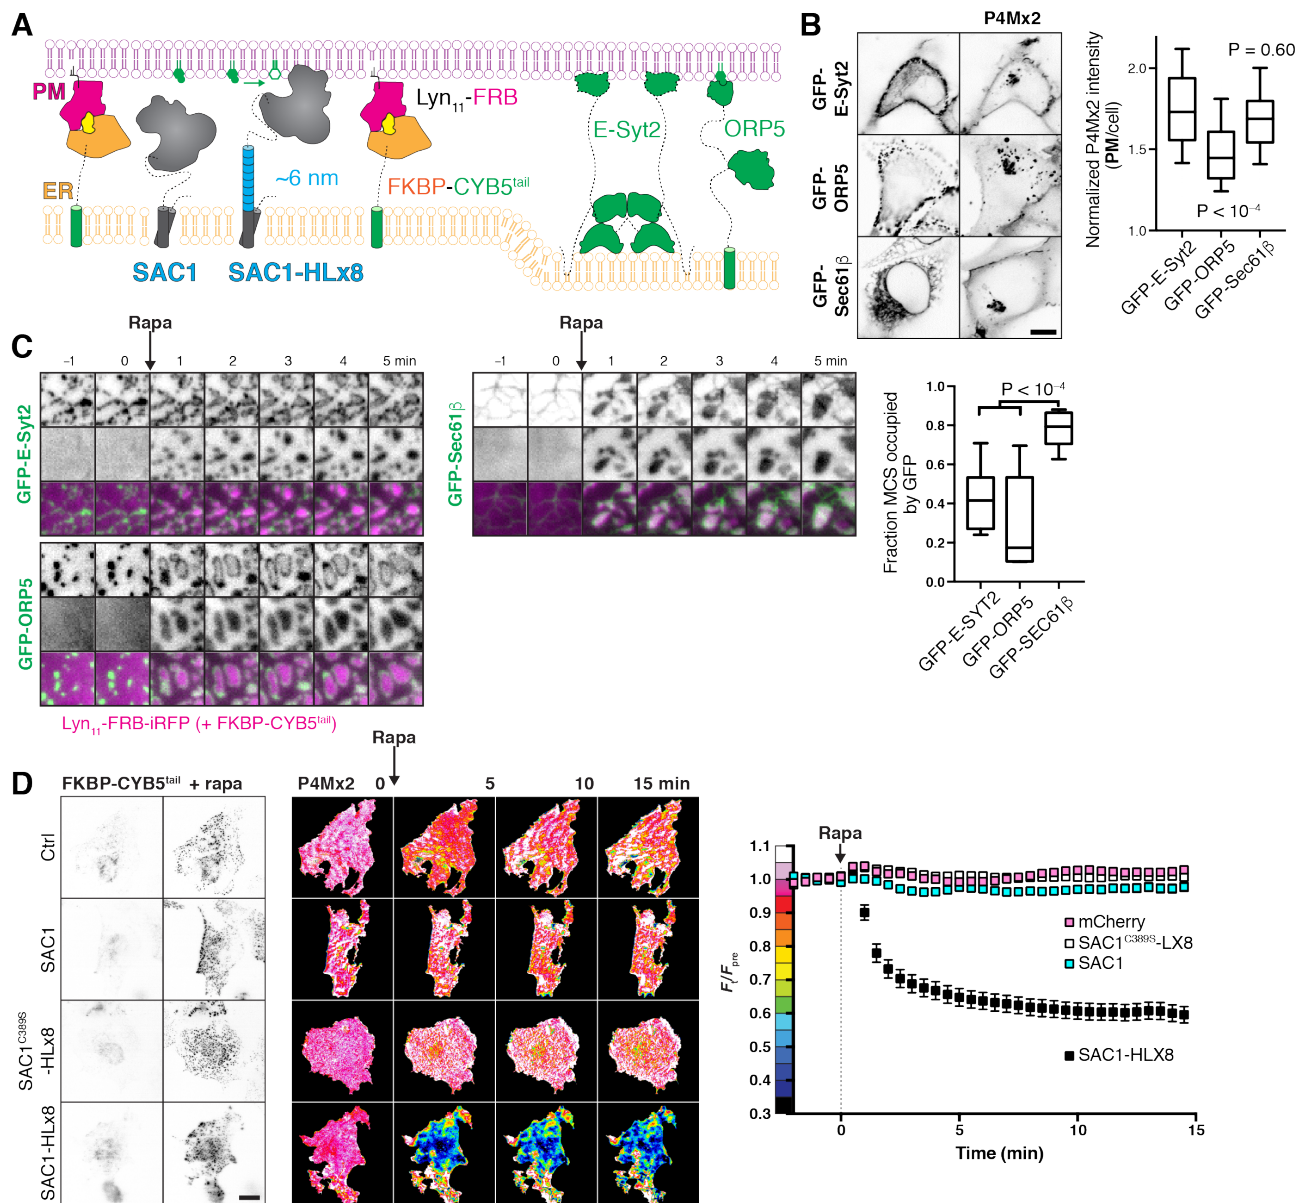

1  
2 **Figure 6 An extended helical linker is required for “trans” activity of SAC1 at induced ER-PM MCS. (A)**  
3 **Induction of artificial ER-PM MCS using rapamycin-induced dimerization of PM Lyn<sub>11</sub>-FRB and ER FKBP-**  
4 **CYB5A<sup>tail</sup>. (B) Over-expression of E-Syt2 does not deplete PtdIns4P.** COS-7 cells over-expressing GFP-  
5 tagged E-Syt2, ORP5 along with mCherry-P4Mx2; scale bar = 10  $\mu$ m. Graph shows P4M intensity at the  
6 plasma membrane (defined by CellMask deep red dye) normalized to total cell intensity; box and whisker plot  
7 shows quartiles and 5-95 percentiles of 89-90 cells from three independent experiments. P values derive from  
8 Dunn’s multiple comparison test compared to Ctrl after a Kruskal-Wallis test (P < 10<sup>-4</sup>). (C) **FKBP-CYB5<sup>tail</sup>**  
9 **induces narrower contact sites than those occupied by E-Syt2 or ORP5.** COS-7 cells expressing the  
10 indicated GFP-fusion protein, Lyn<sub>11</sub>-FRB-iRFP or mCherry-FKBP-CYB5<sup>tail</sup> (not shown), dimerization induced  
11 with Rapa as indicated. Graph shows the fraction of induced contact sites occupied by GFP-fluorescence after  
12 5 min of rapa treatment; box and whisker plot shows quartiles and 5-95 percentiles of 14-19 cells from four  
13 independent experiments. P values derive from Dunn’s multiple comparison test compared to Ctrl after a  
14 Kruskal-Wallis test (P < 10<sup>-4</sup>). (D) **An extended helical linker is required for robust “trans” activity of**  
15 **SAC1 at ER-PM MCS.** Images of TagBFP2-tagged FKBP-CYB5 and GFP-P4Mx2 in COS-7 cells co-transfected  
16 with iRFP-tagged Lyn<sub>11</sub>-FRB and the indicated mCherry-tagged SAC1 construct, or mCherry alone as control.  
17 Images of GFP-P4Mx2 are normalized to the mean pre-stimulation pixel intensity, i.e. F<sub>t</sub>/F<sub>pre</sub> with the color  
18 coding reflected in the graph y-axis. Scale bar = 20  $\mu$ m. Graphs show the fluorescence intensity of GFP-  
19 P4Mx2 in the TIRF footprint each cell (means  $\pm$  s.e., 29-30 cells from three independent experiments)  
20 normalized to the mean pre-stimulation level (F<sub>pre</sub>).

1 We next tested PM PtdIns4P abundance after inducing these ER-PM MCS in cells expressing  
2 either endogenous SAC1 (and mCherry as a control), or over-expressing mCherry-tagged  
3 SAC1, SAC1-HLx8 or SAC1<sup>C389S</sup>-HLx8 (**Figure 6A**). Addition of rapamycin produced robust  
4 formation of ER-PM MCS in all cases (**Figure 6D**), but with strikingly different results on  
5 PM PtdIns4P (**Figure 6D**): co-expression of WT SAC1, SAC1<sup>C389S</sup>-HLx8 or mCherry alone  
6 did not produce a noticeable change in PM PtdIns4P, and were not significantly different  
7 from one another ( $P \geq 0.51$  Tukey's multiple comparisons test, 29-30 cells after a repeated  
8 measures two-way ANOVA comparing proteins,  $P < 10^{-4}$ ); whereas SAC1-HLx8 produced a  
9 robust and rapid depletion of PtdIns4P relative to the other proteins ( $P < 10^{-4}$ , 30 cells)  
10 after induction of ER-PM MCS. We interpret these data to mean that SAC1 has robust  
11 "trans" activity only when an extended helical linker is introduced between the TMD and  
12 catalytic regions; it follows that the native enzyme is unable to produce a conformation that  
13 orients the catalytic domain for efficient "trans" catalysis at ER-PM MCS *in vivo*.

## 14 **6. Discussion**

15 We undertook this study to answer the simple question: does the ER-resident SAC1 lipid  
16 phosphatase act in "cis" or "trans" in the cellular context? This question is important, since  
17 a "cis" acting SAC1 spatially segregates PtdIns4P metabolism, allowing it to drive a PPI<sub>in</sub>MF,  
18 whilst a "trans" acting SAC1 could explain the control of PtdIns4P biosynthesis that  
19 regulates other metabolic and trafficking functions of the lipid. We demonstrated that: (i)  
20 agents that acutely inhibit SAC1 activity in cells produce the accumulation of PtdIns4P  
21 substrate in the ER; (ii) under either resting or MCS forming conditions, SAC1 fails to  
22 enrich at ER-PM MCS, the would-be sites of "trans" activity; (iii) SAC1 has robust "cis"  
23 activity but very poor "trans" activity in living cells; (iv) for appreciable "trans" activity, an  
24 additional ~6 nm linker between the ER localized TMD and the catalytic domain must be

1 introduced. Collectively, these data demonstrate that the enzyme's mode of activity inside a  
2 living, mammalian cell is in "cis".

3 How can these data be reconciled with previous assertions of "trans" activity? *In vitro*  
4 reconstitution approaches have yielded convincing evidence for both "cis" and "trans"  
5 activity (Stefan et al., 2011; Mesmin et al., 2013). However, these approaches are unlikely  
6 to faithfully recapitulate the cellular environment, with all of its constraints inherent to the  
7 complex molecular milieu. Therefore, a conclusive picture will only emerge from studies of  
8 intact cellular systems. "Trans" activity of SAC1 was previously reported to be supported in  
9 yeast by the protein Osh3p at ER-PM MCS (Stefan et al., 2011), though this protein is now  
10 believed to facilitate PtdIns4P transfer, and so these data can equally be interpreted as  
11 supporting "cis" activity of SAC1 (Wong et al., 2017). Similarly, dynamic recruitment of  
12 SAC1 to ER-PM MCS was recently proposed to modulate PM inositol lipid synthesis as a  
13 feedback mechanism (Dickson et al., 2016): it was shown that dynamic relocation of SAC1  
14 from ER-PM MCS during PLC activation functioned as a rheostat, reducing PtdIns4P  
15 catabolism and hence supporting PtdIns(4,5)P<sub>2</sub> re-synthesis. Although a "trans" activity of  
16 SAC1 was suggested to be at work, we suggest that a "cis" acting SAC1 is equally capable of  
17 supporting such a mechanism: notably, PLC activity after activation of highly expressed  
18 muscarinic receptors reduces both PM PtdIns(4,5)P<sub>2</sub> and PtdIns4P (Horowitz et al., 2005),  
19 which will disrupt attachment of the ER-PM tethering E-Syt2 protein (Giordano et al.,  
20 2013) as well as the PtdIns4P-transporting ORP5 and ORP8 proteins (Chung et al., 2015).  
21 Therefore, the dynamic relocation of SAC1 from ER-PM MCS is most likely coincidental to  
22 the loss of ER-PM MCS proteins that support PtdIns4P transport to a "cis" acting ER SAC1.  
23 Over-expression of full-length SAC1 was shown to both reduce steady-state PtdIns4P levels  
24 at the PM and Golgi (Hammond et al., 2014) and accelerate its rate of degradation from

1 the PM (Sohn et al., 2016). These data are most easily interpreted as being due to “trans”  
2 activity. However, we believe these observations can be reconciled with a “cis” acting SAC1.  
3 The yeast homologues of ORP5 and ORP8 that facilitate PM PtdIns4P transport, Osh6p and  
4 Osh7p, have a higher affinity for their inositol lipid ligand than for their cargo lipid,  
5 phosphatidylserine (von Filseck et al., 2015a). Given that in mammalian cells, most of this  
6 cargo lipid is present in the luminal leaflet of the ER (Fairn et al., 2011), its abundance will  
7 be low in the cytosolic leaflet. Since we now show that SAC1 appears not to be enriched at  
8 ER-PM MCS, it therefore seems likely that ORP5 and 8 (or Osh6p and Osh7p) may be able  
9 to back-traffic PtdIns4P before it is degraded by SAC1, i.e. futile cycles of PtdIns4P transfer  
10 from PM to ER and back can occur. SAC1 over-expression would therefore be expected to  
11 decrease such futile reactions and thus deplete PM PtdIns4P. A similar mechanism could be  
12 at work at other PtdIns4P-replete membranes.

13 Our data clearly demonstrate that SAC1 has “cis” activity in mammalian cells. However, we  
14 also showed that the only way to stimulate “trans” activity was to either artificially tether  
15 the protein to contact sites, which resulted in poor activity (**Figure 4**), or to extend the  
16 linker between TMD and catalytic domain by ~6 nm (**Figure 5, Figure 6**), yielding more  
17 robust activity. SAC1’s “reach” in its native form was recently proposed to be no more than  
18 ~7 nm (Gatta and Levine, 2017), whereas the dimensions of native ER-PM MCS vary from  
19 15-25 nm in COS-7, depending on the tethers involved (Fernández-Busnadiego et al.,  
20 2015). We measured SAC1 recruitment at ER-PM MCS that were artificially induced and  
21 appear to have dimensions significantly shorter than this, yet the enzyme still did not  
22 produce robust “trans” activity. It therefore seems clear that SAC1 would be unable to  
23 exhibit “trans” activity at native ER-PM MCS.

1 What are the implications for an obligatory “cis” acting SAC1? First and foremost, it meets  
2 a strict requirement for the enzyme’s role in generating a PPIInMF that can drive non-  
3 vesicular lipid transport (Mesmin et al., 2013). A SAC1 unable to dephosphorylate PtdIns4P  
4 in “trans” at a MCS, but able to efficiently degrade ER PtdIns4P in “cis” ensures the  
5 maintenance of a steep concentration gradient of the lipid between target membrane and  
6 the ER. The potential energy of this gradient can then be efficiently harnessed to drive  
7 vectorial transfer of other lipid cargos. In short, 1 mol of ATP (per mol PtdIns4P  
8 synthesized) is expended for each mol of lipid transferred with a “cis” acting SAC1,  
9 whereas unconstrained “trans” SAC1 activity would force the ratio of ATP expenditure to  
10 lipid transfer to increase.

11 Another important implication of an obligate “cis” acting SAC1 is how the enzyme can  
12 participate in PtdIns4P homeostasis and function more generally. To fully appreciate the  
13 implications, it is necessary to consider the other SAC domain containing proteins  
14 executing PtdIns4P catabolism. These included SAC2, Synaptojanin (Synj) 1 and Synj2  
15 (Chung et al., 1997; Hsu et al., 2015; Nakatsu et al., 2015; Khvotchev and Südhof, 1998).  
16 SAC2 has recently been identified as operating on early and recycling endosomes (Hsu et  
17 al., 2015; Nakatsu et al., 2015), whereas Synj isoforms appear to participate in clathrin-  
18 mediated endocytosis (Perera et al., 2006; Rusk et al., 2003). Together with a “cis” acting  
19 SAC1, it thus appears that PM PtdIns4P degradation occurs only when the lipid leaves the  
20 PM via vesicular (SAC2, Synjs) or non-vesicular traffic (SAC1). In effect, traffic is a key  
21 regulator of PM PtdIns4P metabolism.

22 A “cis” acting SAC1 is easier to reconcile with respect to Golgi PtdIns4P metabolism. A  
23 PPIInMF acting at the (TGN) has been implicated in sterol traffic from the ER into the  
24 secretory pathway (Mesmin et al., 2013; von Filseck et al., 2015b), necessitating a lack of

1 SAC1 activity in the TGN. However, PtdIns4P's selective enrichment at the TGN has been  
2 shown to be controlled by the traffic of SAC1 to cis/medial Golgi membranes (Cheong et  
3 al., 2010), where it is activated by Vps74/GOLPH3 (Cai et al., 2014; Wood et al., 2012). A  
4 lack of proliferative signals stimulates traffic of SAC1 from ER to Golgi, causing reduction  
5 of TGN PtdIns4P pools and a block of secretory vesicular traffic (Blagoveshchenskaya et al.,  
6 2008). Under these conditions, the resulting ablation of the TGN-associated PPIInMF and  
7 shut down of sterol egress would make sense.

8 Turnover of LEL PtdIns4P may also be dependent on PtdIns4P transfer to ER-associated  
9 SAC1, since SAC2 and the Synj isoforms are not poised to operate at this compartment.  
10 Recently, the PtdIns4P transfer activity of LEL-localized ORP1L was shown to be critical for  
11 sterol transfer (Zhao and Ridgway, 2017); however, operation of a LEL PPIInMF does not  
12 make sense in this context, since the sterol concentration in lysosomal membranes is  
13 expected to be high and flux into the ER would be down a concentration gradient (Zhao  
14 and Ridgway, 2017); lysosomal PtdIns4P would actually compete with sterol efflux.  
15 Instead, a reciprocal relationship between LEL sterol content and PtdIns4P synthesis is  
16 expected, which is not consistent with the activation of LEL-associated PI4KIIa by sterols  
17 (Waugh et al., 2006). Clearly, the relationship between LEL PtdIns4P turnover and lipid  
18 traffic is incompletely understood at present.

19 To conclude, we present evidence that SAC1 is an obligate “cis” acting enzyme, competent  
20 to degrade its PtdIns4P substrate only in its resident ER and Golgi membranes. When  
21 considered in the context of MCS-localized OSBP-related PtdIns4P transfer proteins, this  
22 “cis”-acting SAC1 can account for all of the currently assigned functions for this enzyme,  
23 including driving a PPIInMF between recipient organelles and the ER, as well as controlling  
24 PtdIns4P abundance in different organelles. It does, however, implicate a role for non-



1 vesicular transport of inositol lipids in their homeostasis and regulation of their  
2 downstream functions.

### 3 **Acknowledgments**

4 We thank Jen Liou (UTSW), Pietro DeCamilli (Yale School of Medicine), Tom Rapoport  
5 (Harvard Medical School), Michael Davidson (Florida State University), Timothy Sanders  
6 (University of Pittsburgh) and Tamas Balla (NIH) for generously sharing plasmids. We are  
7 indebted to Aarika Yates and the Unified Flow Core (Department of Immunology,  
8 University of Pittsburgh School of Medicine) for assistance with fluorescence activated cell  
9 sorting. This work was supported by National Institutes of Health grant 1R35GM119412-01  
10 (to G.R.V.H.).

### 11 **Impact statement**

12 SAC1 is unable to adopt an efficient “trans” mode of action in living cells.

### 13 **Competing Interests**

14 The authors declare that they have no competing interests.

### 15 **Bibliography**

16

17

18 Balla. Phosphoinositides: Tiny Lipids With Giant Impact on Cell Regulation. *Physiological*  
19 *Reviews* 2013;93:1019–137. doi:10.1152/physrev.00028.2012.

20

21 Blagoveshchenskaya, Cheong, Rohde, Glover, Knödler, Nicolson, et al. Integration of Golgi  
22 trafficking and growth factor signaling by the lipid phosphatase SAC1. *The Journal of Cell*  
23 *Biology* 2008;180:803–12. doi:10.1083/jcb.200708109.

24

25 Blomen, Májek, Jae, Bigenzahn, Nieuwenhuis, Staring, et al. Gene essentiality and synthetic

- 1 lethality in haploid human cells. *Science* 2015;350:1092–6. doi:10.1126/science.aac7557.
- 2
- 3 Boura, Nencka. Phosphatidylinositol 4-kinases: Function, structure, and inhibition.
- 4 *Experimental Cell Research* 2015;337:136–45. doi:10.1016/j.yexcr.2015.03.028.
- 5
- 6 Brockerhoff, Llou. Phosphate incorporation in brain phosphoinositides. *The Journal of*
- 7 *Biological Chemistry* 1962;237:49–52.
- 8
- 9 Cabantous, Terwilliger, Waldo. Protein tagging and detection with engineered self-
- 10 assembling fragments of green fluorescent protein. *Nature Biotechnology* 2004;23:102–7.
- 11 doi:10.1038/nbt1044.
- 12
- 13 Cai, Deng, Horenkamp, Reinisch, Burd. Sac1–Vps74 structure reveals a mechanism to
- 14 terminate phosphoinositide signaling in the Golgi apparatus. *J Cell Biol* 2014;206:485–91.
- 15 doi:10.1083/jcb.201404041.
- 16
- 17 Chang C-L, Hsieh T-S, Yang T, Rothberg K, Azizoglu B, Volk E, et al. Feedback Regulation
- 18 of Receptor-Induced Ca<sup>2+</sup> Signaling Mediated by E-Syt1 and Nir2 at Endoplasmic
- 19 Reticulum-Plasma Membrane Junctions. *Cell Reports* 2013;5:813–825.
- 20 doi:10.1016/j.celrep.2013.09.038.
- 21
- 22 Cheong, Sharma, Blagoveshchenskaya, VMJ O, Brankatschk, Klumperman, et al. Spatial
- 23 Regulation of Golgi Phosphatidylinositol- 4- Phosphate is Required for Enzyme Localization
- 24 and Glycosylation Fidelity. *Traffic* 2010;11:1180–90. doi:10.1111/j.1600-
- 25 0854.2010.01092.x.
- 26
- 27 Chung, Sekiya, Kang, Lee, Han, Kim, et al. Synaptojanin Inhibition of Phospholipase D
- 28 Activity by Hydrolysis of Phosphatidylinositol 4,5-Bisphosphate. *Journal of Biological*
- 29 *Chemistry* 1997;272:15980–5. doi:10.1074/jbc.272.25.15980.
- 30
- 31 Chung, Torta, Masai, Lucast, Czapla, Tanner, et al. PI4P/phosphatidylserine
- 32 countertransport at ORP5- and ORP8-mediated ER–plasma membrane contacts. *Science*
- 33 2015;349:428–32. doi:10.1126/science.aab1370.
- 34
- 35 Cormack, Valdivia, Falkow. FACS-optimized mutants of the green fluorescent protein
- 36 (GFP). *Gene* 1996;173:33–8. doi:10.1016/0378-1119(95)00685-0.
- 37
- 38 Dickson, Jensen, Vivas, Kruse, Traynor-Kaplan, Hille. Dynamic formation of ER–PM
- 39 junctions presents a lipid phosphatase to regulate phosphoinositides. *The Journal of Cell*
- 40 *Biology* 2016;213:33–48. doi:10.1083/jcb.201508106.
- 41
- 42 Dong, Saheki, Swarup, Lucast, Harper, De C. Endosome-ER Contacts Control Actin
- 43 Nucleation and Retromer Function through VAP-Dependent Regulation of PI4P. *Cell*



- 1 2016;166:408–23. doi:10.1016/j.cell.2016.06.037.
- 2
- 3 Fairn, Schieber, Ariotti, Murphy, Kuerschner, Webb, et al. High-resolution mapping reveals  
4 topologically distinct cellular pools of phosphatidylserine. *The Journal of Cell Biology*  
5 2011;194:257–75. doi:10.1083/jcb.201012028.
- 6
- 7 Faulhammer, Kanjilal- Kolar, Knödler, Lo, Lee, Konrad, et al. Growth Control of Golgi  
8 Phosphoinositides by Reciprocal Localization of Sac1 Lipid Phosphatase and Pik1 4- Kinase.  
9 *Traffic* 2007;8:1554–67. doi:10.1111/j.1600-0854.2007.00632.x.
- 10
- 11 Fernández-Busnadiego, Saheki, Camilli. Three-dimensional architecture of extended  
12 synaptotagmin-mediated endoplasmic reticulum–plasma membrane contact sites.  
13 *Proceedings of the National Academy of Sciences* 2015;112:E2004–13.  
14 doi:10.1073/pnas.1503191112.
- 15 von Filseck, Čopič, Delfosse, Vanni, Jackson, Bourguet, et al. Phosphatidylserine transport  
16 by ORP/Osh proteins is driven by phosphatidylinositol 4-phosphate. *Science*  
17 2015a;349:432–6. doi:10.1126/science.aab1346.
- 18
- 19 von Filseck, Vanni, Mesmin, Antonny, Drin. A phosphatidylinositol-4-phosphate powered  
20 exchange mechanism to create a lipid gradient between membranes. *Nature*  
21 *Communications* 2015b;6:ncomms7671. doi:10.1038/ncomms7671.
- 22
- 23 Gatta, Levine. Piecing Together the Patchwork of Contact Sites. *Trends in Cell Biology*  
24 2017;27:214–29. doi:10.1016/j.tcb.2016.08.010.
- 25
- 26 Giordano, Saheki, Idevall-Hagren, Colombo, Pirruccello, Milosevic, et al. PI(4,5)P2-  
27 Dependent and Ca<sup>2+</sup>-Regulated ER-PM Interactions Mediated by the Extended  
28 Synaptotagmins. *Cell* 2013;153:1494–509. doi:10.1016/j.cell.2013.05.026.
- 29
- 30 Goto, Charman, Ridgway. Oxysterol-binding Protein Activation at Endoplasmic Reticulum-  
31 Golgi Contact Sites Reorganizes Phosphatidylinositol 4-Phosphate Pools. *Journal of*  
32 *Biological Chemistry* 2016;291:1336–47. doi:10.1074/jbc.m115.682997.
- 33
- 34 Guo, Stolz, Lemrow, York. SAC1-like Domains of Yeast SAC1, INP52, and INP53 and of  
35 Human Synptotjanin Encode Polyphosphoinositide Phosphatases. *Journal of Biological*  
36 *Chemistry* 1999;274:12990–5. doi:10.1074/jbc.274.19.12990.
- 37
- 38 Hammond, Balla. Polyphosphoinositide binding domains: Key to inositol lipid biology.  
39 *Biochimica et Biophysica Acta (BBA) - Molecular and Cell Biology of Lipids*  
40 2015;1851:746–58. doi:10.1016/j.bbalip.2015.02.013.
- 41
- 42 Hammond, Machner, Balla. A novel probe for phosphatidylinositol 4-phosphate reveals

- 1 multiple pools beyond the Golgi. *The Journal of Cell Biology* 2014;205:113–26.  
2 doi:10.1083/jcb.201312072.  
3
- 4 Ho, Biggar, Spencer, Schreiber, Crabtree. Dimeric ligands define a role for transcriptional  
5 activation domains in reinitiation. *Nature* 1996;382:822–6. doi:10.1038/382822a0.  
6
- 7 Horowitz, Hirdes, Suh, Hilgemann, Mackie, Hille. Phospholipase C in Living Cells. *The*  
8 *Journal of General Physiology* 2005;126:243–62. doi:10.1085/jgp.200509309.  
9
- 10 Hsu, Hu, Mao. Spatiotemporal control of phosphatidylinositol 4-phosphate by Sac2  
11 regulates endocytic recycling. *The Journal of Cell Biology* 2015;209:97–110.  
12 doi:10.1083/jcb.201408027.  
13
- 14 Hughes, Saito, Schlesinger, Ornitz. Otopetrin 1 activation by purinergic nucleotides  
15 regulates intracellular calcium. *Proceedings of the National Academy of Sciences*  
16 2007;104:12023–8. doi:10.1073/pnas.0705182104.  
17
- 18 Hughes, Woscholski, Cooke, Patrick, Dove, nald, et al. SAC1 Encodes a Regulated Lipid  
19 Phosphoinositide Phosphatase, Defects in Which Can Be Suppressed by the Homologous  
20 Inp52p and Inp53p Phosphatases. *Journal of Biological Chemistry* 2000;275:801–8.  
21 doi:10.1074/jbc.275.2.801.  
22
- 23 Jović, Kean, Dubankova, Boura, Gingras, Brill, et al. Endosomal sorting of VAMP3 is  
24 regulated by PI4K2A. *Journal of Cell Science* 2014;127:3745–56. doi:10.1242/jcs.148809.  
25
- 26 Jović, Kean, Szentpetery, Polevoy, Gingras, Brill, et al. Two phosphatidylinositol 4-kinases  
27 control lysosomal delivery of the Gaucher disease enzyme,  $\beta$ -glucocerebrosidase. *Molecular*  
28 *Biology of the Cell* 2012;23:1533–45. doi:10.1091/mbc.e11-06-0553.  
29
- 30 Khvotchev, Südhof. Developmentally Regulated Alternative Splicing in a Novel  
31 Synaptojanin. *Journal of Biological Chemistry* 1998;273:2306–11.  
32 doi:10.1074/jbc.273.4.2306.  
33
- 34 Kim, Guzman-Hernandez, Wisniewski, Balla. Phosphatidylinositol-Phosphatidic Acid  
35 Exchange by Nir2 at ER-PM Contact Sites Maintains Phosphoinositide Signaling  
36 Competence. *Developmental Cell* 2015;33:549–61. doi:10.1016/j.devcel.2015.04.028.  
37
- 38 Klinkenberg, Long, Shome, Watkins, Aridor. A cascade of ER exit site assembly that is  
39 regulated by p125A and lipid signals. *J Cell Sci* 2014;127:1765–78.  
40 doi:10.1242/jcs.138784.  
41
- 42 Komatsu, Kukelyansky, McCaffery, Ueno, Varela, Inoue. Organelle-specific, rapid induction  
43 of molecular activities and membrane tethering. *Nature Methods* 2010;7:206–8.

1 doi:10.1038/nmeth.1428.

2

3 Konrad, Schlecker, Faulhammer, Mayinger. Retention of the Yeast Sac1p Phosphatase in  
4 the Endoplasmic Reticulum Causes Distinct Changes in Cellular Phosphoinositide Levels  
5 and Stimulates Microsomal ATP Transport. *Journal of Biological Chemistry*  
6 2002;277:10547–54. doi:10.1074/jbc.m200090200.

7

8 Leonetti, Sekine, Kamiyama, Weissman, Huang. A scalable strategy for high-throughput  
9 GFP tagging of endogenous human proteins. *Proceedings of the National Academy of*  
10 *Sciences* 2016;113:E3501–8. doi:10.1073/pnas.1606731113.

11

12 Levin, GRV H, Balla, Camilli, Fairn, Grinstein. Multiphasic dynamics of phosphatidylinositol  
13 4-phosphate during phagocytosis. *Molecular Biology of the Cell* 2016;28:128–40.  
14 doi:10.1091/mbc.e16-06-0451.

15

16 Liou, Kim, Heo, Jones, Myers, Ferrell, et al. STIM Is a Ca<sup>2+</sup> Sensor Essential for Ca<sup>2+</sup>-  
17 Store-Depletion-Triggered Ca<sup>2+</sup> Influx. *Current Biology* 2005;15:1235–41.  
18 doi:10.1016/j.cub.2005.05.055.

19

20 Liu, Boukhelifa, Tribble, Morin-Kensicki, Uetrecht, Bear, et al. The Sac1 Phosphoinositide  
21 Phosphatase Regulates Golgi Membrane Morphology and Mitotic Spindle Organization in  
22 Mammals. *Molecular Biology of the Cell* 2008;19:3080–96. doi:10.1091/mbc.e07-12-1290.

23

24 Luo, Busillo, Benovic. M3 Muscarinic Acetylcholine Receptor-Mediated Signaling Is  
25 Regulated by Distinct Mechanisms. *Molecular Pharmacology* 2008;74:338–47.  
26 doi:10.1124/mol.107.044750.

27

28 Manford, Xia, Saxena, Stefan, Hu, Emr, et al. Crystal structure of the yeast Sac1:  
29 implications for its phosphoinositide phosphatase function. *The EMBO Journal*  
30 2010;29:1489–98. doi:10.1038/emboj.2010.57.

31

32 Mesmin, Bigay, Moser von F, Lacas-Gervais, Drin, Antonny. A Four-Step Cycle Driven by  
33 PI(4)P Hydrolysis Directs Sterol/PI(4)P Exchange by the ER-Golgi Tether OSBP. *Cell*  
34 2013;155:830–43. doi:10.1016/j.cell.2013.09.056.

35

36 Nakatsu, Messa, Nández, Czapla, Zou, Strittmatter, et al. Sac2/INPP5F is an inositol 4-  
37 phosphatase that functions in the endocytic pathway. *The Journal of Cell Biology*  
38 2015;209:85–95. doi:10.1083/jcb.201409064.

39

40 Nemoto, Kearns, Wenk, Chen, Mori, Alb, et al. Functional characterization of a mammalian  
41 Sac1 and mutants exhibiting substrate specific defects in phosphoinositide phosphatase  
42 activity. *Journal of Biological Chemistry* 2000;275:34293–305.  
43 doi:10.1074/jbc.m003923200.

- 1  
2 Perera, Zoncu, Lucast, Camilli, Toomre. Two synaptojanin 1 isoforms are recruited to  
3 clathrin-coated pits at different stages. *Proceedings of the National Academy of Sciences*  
4 2006;103:19332–7. doi:10.1073/pnas.0609795104.  
5  
6 Phillips, Voeltz. Structure and function of ER membrane contact sites with other organelles.  
7 *Nature Reviews Molecular Cell Biology* 2015;17:69–82. doi:10.1038/nrm.2015.8.  
8  
9 Posor, Eichhorn-Gruenig, Puchkov, Schöneberg, Ullrich, Lampe, et al. Spatiotemporal  
10 control of endocytosis by phosphatidylinositol-3,4-bisphosphate. *Nature* 2013;499:233–7.  
11 doi:10.1038/nature12360.  
12  
13 Rivas, Kearns, Xie, Guo, Sekar, Hosaka, et al. Pleiotropic Alterations in Lipid Metabolism in  
14 *Yeastsac1* Mutants: Relationship to “Bypass *Sec14p*” and Inositol Auxotrophy. *Molecular*  
15 *Biology of the Cell* 1999;10:2235–50. doi:10.1091/mbc.10.7.2235.  
16  
17 Rohde, Cheong, Konrad, Paiha, Mayinger, Boehmelt. The Human Phosphatidylinositol  
18 Phosphatase SAC1 Interacts with the Coatamer I Complex. *Journal of Biological Chemistry*  
19 2003;278:52689–99. doi:10.1074/jbc.m307983200.  
20  
21 Rosivatz, Matthews, nald, Mulet, Ho, Lossi, et al. A Small-Molecule Inhibitor for  
22 Phosphatase and Tensin Homologue Deleted on Chromosome 10 (*PTEN*). *ACS Chemical*  
23 *Biology* 2006;1:780–90. doi:10.1021/cb600352f.  
24  
25 Ross, Lindsay, Safrany, Lorenzo, Villa, Toth, et al. Differential redox regulation within the  
26 PTP superfamily. *Cellular Signalling* 2007;19:1521–30. doi:10.1016/j.cellsig.2007.01.026.  
27  
28 Roy, Levine. Multiple Pools of Phosphatidylinositol 4-Phosphate Detected Using the  
29 Pleckstrin Homology Domain of *Osh2p*. *Journal of Biological Chemistry* 2004;279:44683–9.  
30 doi:10.1074/jbc.m401583200.  
31  
32 Rusk, Le, Mariggio, Guay, Lurisci, Nabi, et al. Synaptojanin 2 Functions at an Early Step of  
33 Clathrin-Mediated Endocytosis. *Current Biology* 2003;13:659–63. doi:10.1016/s0960-  
34 9822(03)00241-0.  
35  
36 Saheki, Bian, Schauder, Sawaki, Surma, Klose, et al. Control of plasma membrane lipid  
37 homeostasis by the extended synaptotagmins. *Nature Cell Biology* 2016;18:504–15.  
38 doi:10.1038/ncb3339.  
39  
40 Saint-Jean, Delfosse, Douguet, Chicanne, Payrastra, Bourguet, et al. *Osh4p* exchanges  
41 sterols for phosphatidylinositol 4-phosphate between lipid bilayers. *The Journal of Cell*  
42 *Biology* 2011;195:965–78. doi:10.1083/jcb.201104062.  
43

- 1 Shaner, Campbell, Steinbach, Giepmans, Palmer, Tsien. Improved monomeric red, orange  
2 and yellow fluorescent proteins derived from *Discosoma* sp. red fluorescent protein. *Nature*  
3 *Biotechnology* 2004;22:1567–72. doi:10.1038/nbt1037.
- 4
- 5 Shcherbakova, Verkhusha. Near-infrared fluorescent proteins for multicolor in vivo  
6 imaging. *Nature Methods* 2013;10:751–4. doi:10.1038/nmeth.2521.
- 7
- 8 Sohn, Ivanova, Brown, Toth, Varnai, Kim, et al. Lenz-Majewski mutations in PTDSS1 affect  
9 phosphatidylinositol 4-phosphate metabolism at ER-PM and ER-Golgi junctions.  
10 *Proceedings of the National Academy of Sciences* 2016;113:4314–9.  
11 doi:10.1073/pnas.1525719113.
- 12
- 13 Stefan, Manford, Baird, Yamada-Hanff, Mao, Emr. Osh Proteins Regulate Phosphoinositide  
14 Metabolism at ER-Plasma Membrane Contact Sites. *Cell* 2011;144:389–401.  
15 doi:10.1016/j.cell.2010.12.034.
- 16
- 17 Stephens, Hughes, Irvine. Pathway of phosphatidylinositol(3,4,5)-trisphosphate synthesis in  
18 activated neutrophils. *Nature* 1991;351:33–9. doi:10.1038/351033a0.
- 19
- 20 Subach, Cranfill, Davidson, Verkhusha. An Enhanced Monomeric Blue Fluorescent Protein  
21 with the High Chemical Stability of the Chromophore. *PLoS ONE* 2011;6:e28674.  
22 doi:10.1371/journal.pone.0028674.
- 23
- 24 Tahirovic, Schorr, Mayinger. Regulation of Intracellular Phosphatidylinositol- 4- Phosphate  
25 by the Sac1 Lipid Phosphatase. *Traffic* 2005;6:116–30. doi:10.1111/j.1600-  
26 0854.2004.00255.x.
- 27
- 28 Tan, Brill. Cinderella story: PI4P goes from precursor to key signaling molecule. *Critical*  
29 *Reviews in Biochemistry and Molecular Biology* 2013;49:33–58.  
30 doi:10.3109/10409238.2013.853024.
- 31
- 32 Várnai, Tóth, Tóth, Hunyady, Balla. Visualization and Manipulation of Plasma Membrane-  
33 Endoplasmic Reticulum Contact Sites Indicates the Presence of Additional Molecular  
34 Components within the STIM1-Orai1 Complex. *Journal of Biological Chemistry*  
35 2007;282:29678–90. doi:10.1074/jbc.m704339200.
- 36 van Vliet, Giordano, Gerlo, Segura, Eygen, Molenberghs, et al. The ER Stress Sensor PERK  
37 Coordinates ER-Plasma Membrane Contact Site Formation through Interaction with  
38 Filamin-A and F-Actin Remodeling. *Molecular Cell* 2017;65:885–899.e6.  
39 doi:10.1016/j.molcel.2017.01.020.
- 40
- 41 Voeltz, Prinz, Shibata, Rist, Rapoport. A Class of Membrane Proteins Shaping the Tubular  
42 Endoplasmic Reticulum. *Cell* 2006;124:573–86. doi:10.1016/j.cell.2005.11.047.

1

2 Wang, Birsoy, Hughes, Krupczak, Post, Wei, et al. Identification and characterization of  
3 essential genes in the human genome. *Science* 2015;350:1096–101.  
4 doi:10.1126/science.aac7041.

5

6 Wang, Sun, Macia, Kirchhausen, Watson, Bonifacino, et al. PI4P Promotes the Recruitment  
7 of the GGA Adaptor Proteins to the Trans-Golgi Network and Regulates Their Recognition  
8 of the Ubiquitin Sorting Signal. *Molecular Biology of the Cell* 2007;18:2646–55.  
9 doi:10.1091/mbc.e06-10-0897.

10

11 Wang, Wang, Sun, Martinez, Sun, Macia, et al. Phosphatidylinositol 4 Phosphate Regulates  
12 Targeting of Clathrin Adaptor AP-1 Complexes to the Golgi. *Cell* 2003;114:299–310.  
13 doi:10.1016/s0092-8674(03)00603-2.

14

15 Waugh, Minogue, Chotai, Berditchevski, Hsuan. Lipid and Peptide Control of  
16 Phosphatidylinositol 4-Kinase II $\alpha$  Activity on Golgi-endosomal Rafts. *Journal of Biological*  
17 *Chemistry* 2006;281:3757–63. doi:10.1074/jbc.m506527200.

18

19 Weber, Wagner, Hilbi. Live-Cell Imaging of Phosphoinositide Dynamics and Membrane  
20 Architecture during Legionella Infection. *mBio* 2014;5:e00839-13.  
21 doi:10.1128/mBio.00839-13.

22

23 Whitters, Cleves, McGee, Skinner, Bankaitis. SAC1p is an integral membrane protein that  
24 influences the cellular requirement for phospholipid transfer protein function and inositol  
25 in yeast. *The Journal of Cell Biology* 1993;122:79–94. doi:10.1083/jcb.122.1.79.

26

27 Wong, Čopič, Levine. Advances on the Transfer of Lipids by Lipid Transfer Proteins. *Trends*  
28 *in Biochemical Sciences* 2017;42:516–30. doi:10.1016/j.tibs.2017.05.001.

29

30 Wood, Hung, Huoh, Mousley, Stefan, Bankaitis, et al. Local control of phosphatidylinositol  
31 4-phosphate signaling in the Golgi apparatus by Vps74 and Sac1 phosphoinositide  
32 phosphatase. *Molecular Biology of the Cell* 2012;23:2527–36. doi:10.1091/mbc.e12-01-  
33 0077.

34

35 Yan, Imanishi, Futaki, Sugiura.  $\alpha$ -Helical Linker of an Artificial 6-Zinc Finger Peptide  
36 Contributes to Selective DNA Binding to a Discontinuous Recognition Sequence†.  
37 *Biochemistry* 2007;46:8517–24. doi:10.1021/bi7006417.

38

39 Yusa, Zhou, Li, Bradley, Craig. A hyperactive piggyBac transposase for mammalian  
40 applications. *Proceedings of the National Academy of Sciences* 2011;108:1531–6.  
41 doi:10.1073/pnas.1008322108.

42

43 Zhao, Ridgway. Oxysterol-Binding Protein-Related Protein 1L Regulates Cholesterol Egress



1 from the Endo-Lysosomal System. *Cell Reports* 2017;19:1807–18.  
2 doi:10.1016/j.celrep.2017.05.028.

3

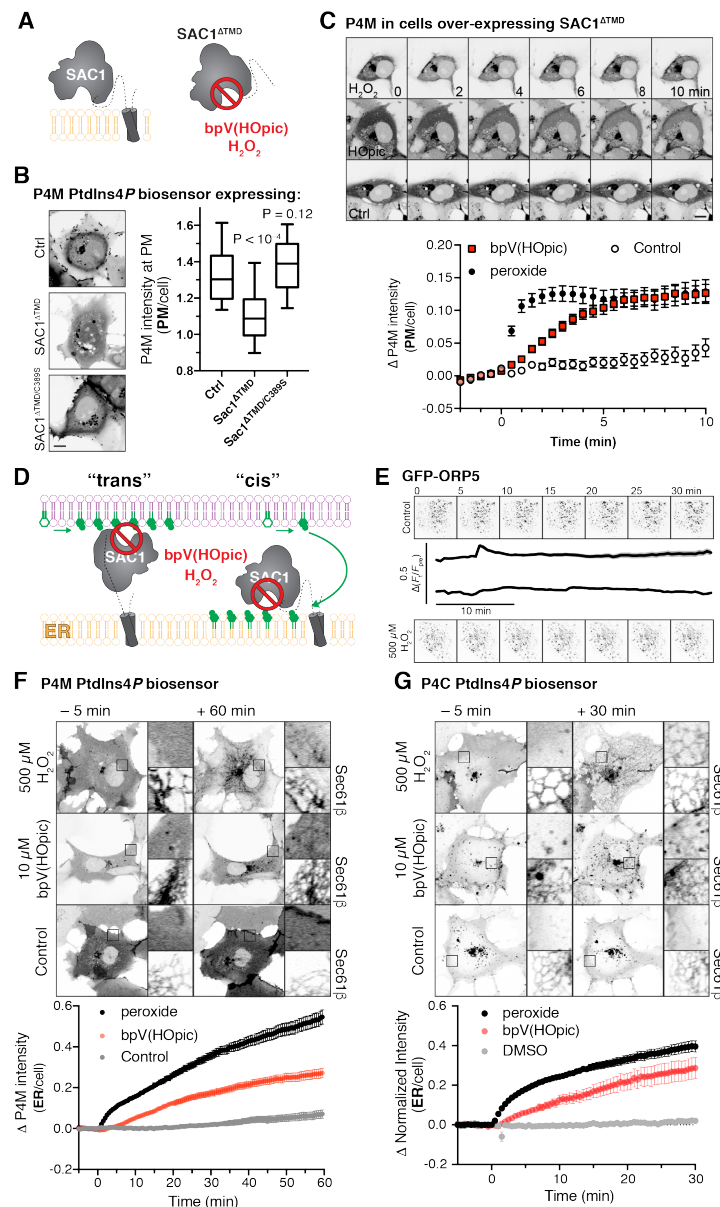

1  
2 **Figure 1 Inhibition of SAC1 causes PtdIns4P accumulation in the ER.** (A) A soluble fragment of SAC1  
3 (SAC1<sup>ΔTMD</sup>) is inhibited by peroxide and bpV(HOpic). (B). SAC1 expression depletes PM PtdIns4P. COS-7  
4 cells transfected with GFP-P4M and either FKBP-mCherry (Ctrl), SAC1<sup>ΔTMD</sup>-FKBP-mCherry or catalytically  
5 inactive SAC1<sup>ΔTMD/C389S</sup>-FKBP-mCherry were imaged live by confocal microscopy. Representative images are  
6 shown (bar = 10  $\mu$ m). The graph shows P4M intensity at the plasma membrane (defined by CellMask deep  
7 red dye) normalized to total cell intensity; box and whisker plot shows quartiles and 5-95 percentiles of 90  
8 cells from three independent experiments. *P* values derive from Dunn's multiple comparison test compared to  
9 Ctrl after a Kruskal-Wallis test ( $P < 10^{-4}$ ). (C). **Peroxide and bpV(HOpic) inhibit SAC1 in live cells.** COS-7  
10 cells were transfected with P4M and SAC1<sup>ΔTMD</sup> as in B and imaged by time-lapse confocal microscopy. 500  $\mu$ M  
11 peroxide or 10  $\mu$ M bpV(HOpic) were added at time 0. P4M intensity was quantified as in B. Data are means  $\pm$   
12 s.e. of 44 or 45 cells from four independent experiments. Scale bar = 10  $\mu$ m. (D) **Predicted PtdIns4P**  
13 **accumulation for "cis" and "trans" operation of SAC1.** (E) **peroxide does not disrupt ORP5 localization**  
14 **at ER-PM MCS.** Images show TIRF images of COS-7 cells expressing GFP-ORP5 at the indicated times. Traces  
15 are means with s.e. shaded for 31-32 cells from three independent experiments. (F-G). **SAC1 inhibitors**  
16 **cause PtdIns4P accumulation in the ER.** Time-lapse images of representative COS-7 cells expressing GFP-  
17 P4M (F) or GFP-P4C (G) and treated with inhibitors at time 0. The insets are 10  $\mu$ m squares, and are  
18 expanded at right and show PtdIns4P accumulation relative to a co-expressed ER marker, iRFP-Sec61 $\beta$ .  
19 Graphs show P4M intensity at the ER (defined by iRFP-Sec61 $\beta$ ) normalized to total cell intensity; data are  
20 means  $\pm$  s.e. of 38-41 (F) or 29-30 (G) cells from three (G) or four (F) independent experiments.



1 **Figure 2 Localization of SAC1 relative to ER-PM MCS and ER proteins. (A) Strategy for tagging**  
 2 **endogenous SAC1:** a guide RNA is complexed with Cas9 protein and electroplated into HEK-293A cells with  
 3 a short single-stranded homology-directed repair (HDR) template. This adds a short tag encoding the 11th  
 4 strand of the GFP beta barrel. When expressed, this strand assembles with co-expressed GFP1-10 to make  
 5 functional GFP. **(B) Specificity of genomic tagging.** 293A cells stably over-expressing GFP1-10 and edited  
 6 with the indicated GFP11 tags were genotyped with GFP11 specific forward primers and a gene-specific  
 7 reverse primer located ~200 bp downstream in exon 1. **(C) Confocal images of GFP11 gene edited cells** co-  
 8 expressing mKO-Manosidase II as a cis/medial Golgi marker, or mCherry-VAPB as an ER marker. **(D) ESyt-1**  
 9 **shows enrichment at the PM relative to SAC1 and Sec61β.** Cells were imaged in both TIRF and epi-  
 10 illumination, and the fluorescence intensity ratio of the two images was calculated. Boxes represent quartiles,  
 11 whiskers 5-95 percentile. P values are from Dunn's Multiple Comparisons following a Kruskal-Wallis test ( $P <$   
 12  $10^{-4}$ ). Data are from 180 (E-Syt1), 234 (SAC1) or 246 (Sec61β) cells imaged across five independent  
 13 experiments. Insets = 10  $\mu$ m. **(E) Expressed SAC1 is not enriched at ER-PM MCS in COS-7 cells.** TIRF  
 14 images of COS-7 cells transfected for 24 hours with the indicated GFP-tagged plasmid and mCherry-MAPPER  
 15 to label ER-PM MCS along with iRFP-Sec61β to label total ER. Scale bar = 10  $\mu$ m. The MCS index is the  
 16 "difference of differences" between GFP and iRFP-Sec61β as well as GFP and MAPPER signals. P values are  
 17 from Dunn's Multiple Comparison test relative to GFP-Sec61β, run as a post-hoc to a Kruskal-Wallis test ( $P <$   
 18  $10^{-4}$ ). Box and whiskers are quartiles with 10-90 percentiles of 90 (Sec61β), 92 (Calreticulin), 91 (SAC1), 93  
 19 (MAPPER) or 92 (ESyt2, ORP5) cells imaged across three independent experiments.





1  
2 **Figure 3 Recruitment of proteins to ER-PM MCS (A).** Transfected SAC1 does not dynamically re-  
3 distribute to ER-PM MCS in COS-7 cells. Time-lapse TIRF microscopy of COS-7 cells transfected with the  
4 indicated GFP-tagged proteins for 6-7 hours. Cells were stimulated with 100  $\mu$ M ATP as indicated. Insets = 10  
5  $\mu$ m. The traces at right show  $\Delta(F_i/F_{pre})$  and are means  $\pm$  s.e. of 30 (Sec61 $\beta$ , SAC1, Calreticulin), 27 (STIM1),  
6 29 (ESyt1) or 20 (Nir2) cells imaged across three independent experiments. **(B) Gene edited alleles do not**  
7 **perturb calcium signals.** Edited 293A<sup>GFP1-10</sup> cells were loaded with Fura-red and the ratio of fluorescence  
8 intensity with respect to 405 and 488 nm excitation was measured. Cells were stimulated with carbachol  
9 (CCh) at 30 s to activate phospholipase C signaling. Data are grand means of four experiments (shaded  
10 regions represent s.e.). The P value represents results of a two-way ANOVA comparing cell lines. **(C)**  
11 **Endogenous SAC1 does not recruit to ER-PM contact sites in 293A<sup>GFP1-10</sup> cells.** Images show representative  
12 gene-edited cells at the indicated times during time-lapse TIRF imaging. Carbachol was added to stimulate  
13 phospholipase C signaling time 0. Images are averages of 5 frames acquired over 10 s to improve signal to  
14 noise. Traces represent mean change in fluorescence intensity (normalized to pre-stimulation levels) with s.e.  
15 of 40 (E-Syt1), 38 (SAC1) or 37 (Sec61 $\beta$ ) cells imaged across five independent experiments.



1  
 2 **Figure 4 SAC1 is much more active at the PM in “cis” or**  
 3 **“trans” using the FRB/FKBP12 heterodimerization system. (B) PM PtdIns4P is still detectable at the PM**  
 4 **with P4Mx2 after transfection with SAC1<sup>ΔTMD</sup>. COS-7 cells transfected with GFP-P4M and either FKBP-**  
 5 **mCherry (Ctrl), SAC1<sup>ΔTMD</sup>-FKBP-mCherry or catalytically inactive SAC1<sup>ΔTMD/C389S</sup> were imaged live by confocal**  
 6 **microscopy. Representative images are shown (bar = 20 μm). The graph shows P4M intensity at the plasma**  
 7 **membrane (defined by CellMask deep red dye) normalized to total cell intensity; box and whisker plot shows**  
 8 **quartiles and 5-95 percentiles of 90 cells from three independent experiments. P values derive from Dunn's**  
 9 **multiple comparison test compared to Ctrl after a Kruskal-Wallis test (P < 10<sup>-4</sup>).** (C). **Recruitment of SAC1 to**  
 10 **the PM in “cis” is far more effective in depleting PtdIns4P than it is in “trans”. TIRF images of COS-7**  
 11 **cells transfected with a Lyn<sub>11</sub>-FRB-iRFP PM recruiter, the indicated mCherry-tagged SAC1-FKBP or FKBP-**  
 12 **SAC1, and GFP-P4Mx2. Graphs show means ± s.e. Images are representative of n cells, x independent**  
 13 **experiments: 57, 6 (FKBP-SAC1); 41, 4 (FKBP-SAC1<sup>C389S</sup>); 28, 3 (SAC1-FKBP); 30, 3 (SAC1-FKBP); 57, 6**  
 14 **(SAC1-FKBP); 36, 4 (SAC1-FKBP); 26, 3 (FKBP-SAC1); 29, 3 (SAC1<sup>Δ452-587</sup>). Inset graphs show the raw change**  
 15 **in signal intensity for the mCherry-FKBP tagged SAC1 chimeras. Images of GFP-P4Mx2 are normalized to the**  
 16 **mean pre-stimulation pixel intensity, i.e.  $F_t/F_{pre}$  with the color coding reflected in the graph y-axis. Scale bar**  
 17 **= 20 μm.**



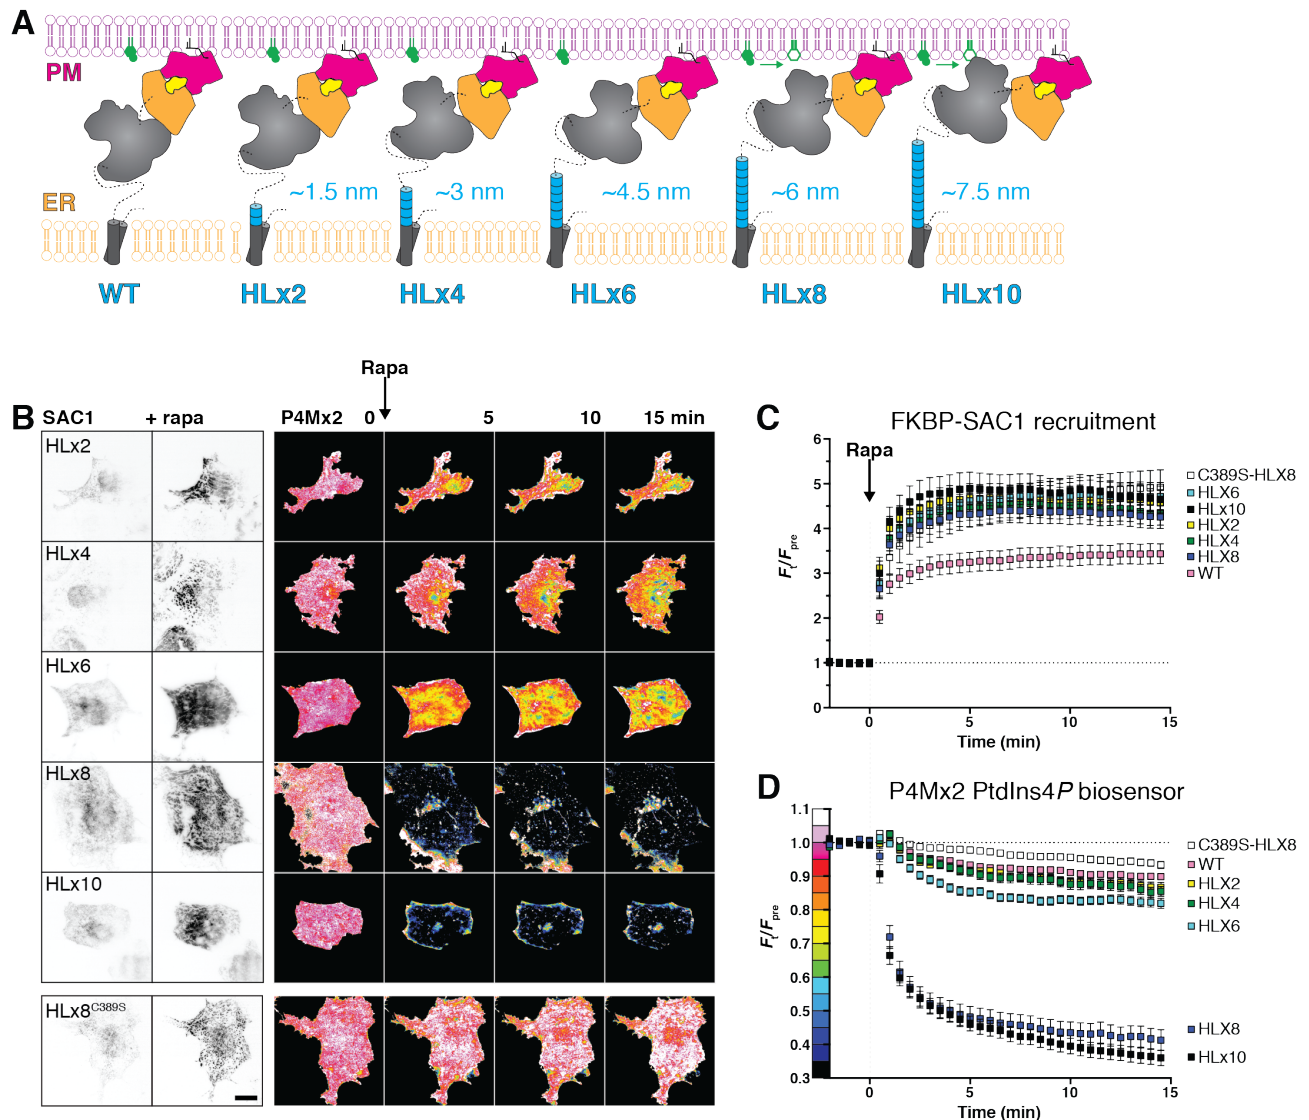

1  
 2 **Figure 5 An extended helical linker confers “trans” activity to SAC1.** (A) Helical linkers (HL) added to  
 3 FKBP-SAC1 at the end of the first transmembrane domain. Each helical repeat consists of the amino acids  
 4 EAAAR, expected to form a helix approximately 0.75 nm long. (B) TIRF imaging of PtdIns4P before and  
 5 after direct recruitment of SAC1 to ER-PM MCS. TIRF images of COS-7 cells transfected with a Lyn<sub>11</sub>-FRB-  
 6 iRFP PM recruiter, the indicated mCherry-tagged SAC1-FKBP and GFP-P4Mx2. Images are representative of  
 7 30 cells from three independent experiments. Images of GFP-P4Mx2 are normalized to the mean pre-  
 8 stimulation pixel intensity, i.e.  $F/F_{pre}$  with the color coding reflected in the graph y-axis of D. Scale bar = 20  
 9  $\mu$ m. (C) Helical linkers do not impair recruitment efficiency of FKBP-SAC1. (D) FKBP-SAC1-HLx8 and -  
 10 HLx10 have “trans” activity. Graphs in C and D show fluorescence intensity in the TIRF footprint of each cell  
 11 for mCherry-tagged FKBP-SAC1 or GFP-tagged P4Mx2, respectively. Data are means  $\pm$  s.e., 30 cells for all  
 12 except WT, with 57 cells. Data for the wild-type FKBP-SAC1 is re-plotted from fig. 4.

13

14 These experiments demonstrated a weak capacity of SAC1 chimeras to act in “trans” when  
 15 they were forced into a conformation spanning the ER-PM junction by heterodimerization.  
 16 This is likely a poor representation of the physiologic state, wherein other proteins would  
 17 mediate ER-PM MCS tethering and SAC1 would not be subject to such conformational



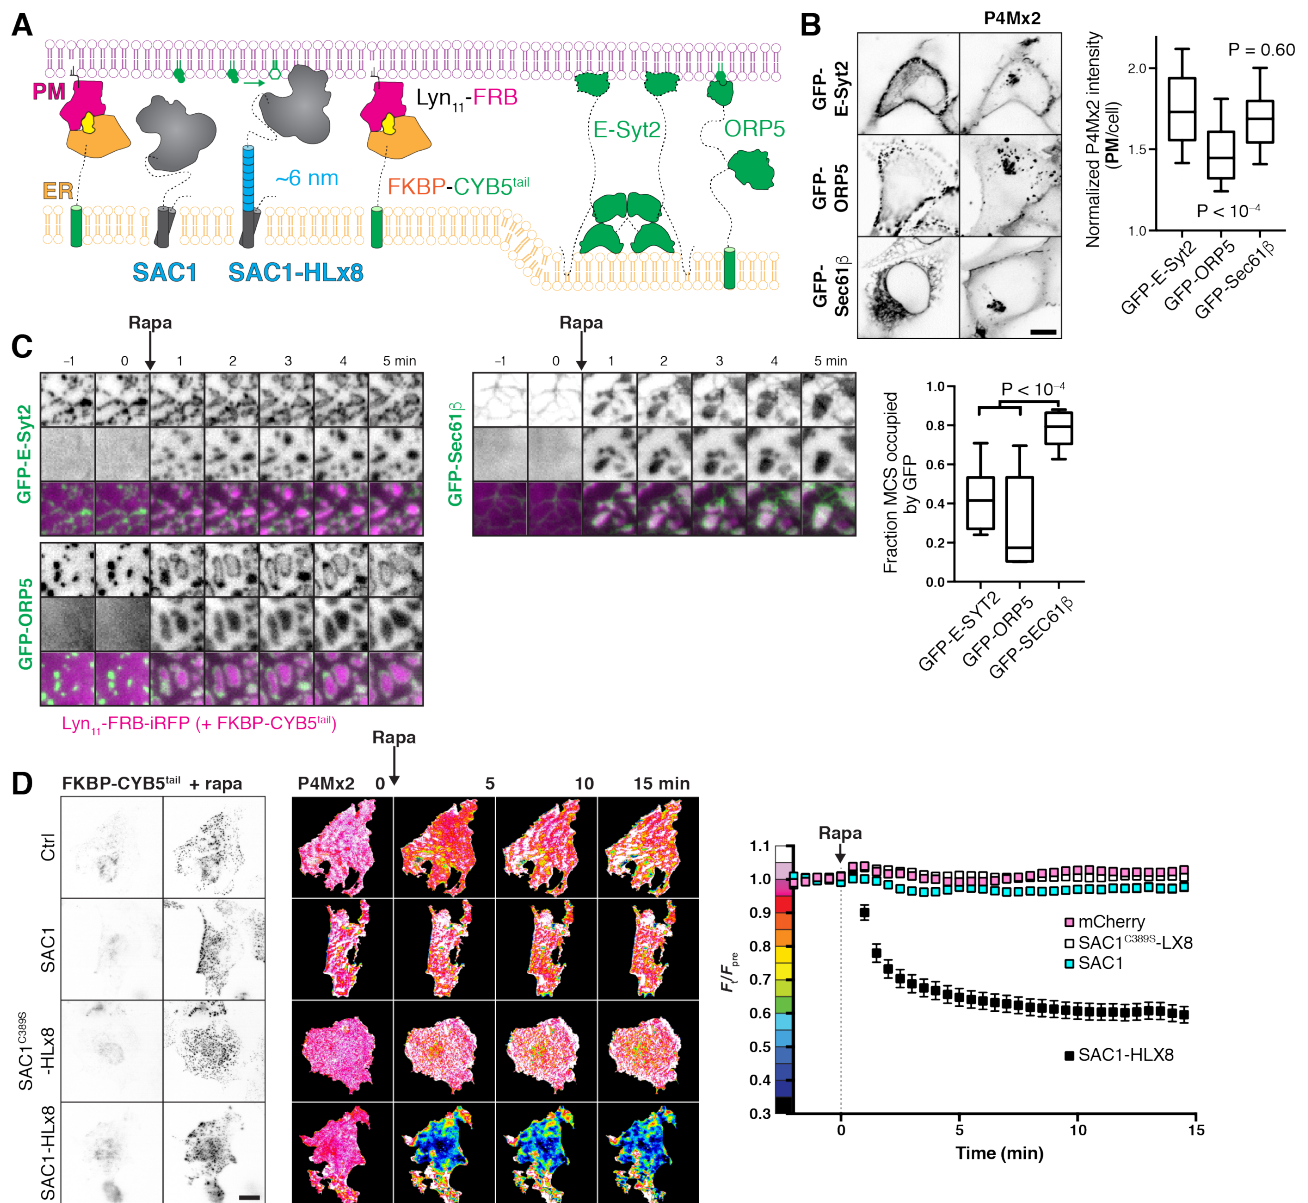

1  
2 **Figure 6 An extended helical linker is required for “trans” activity of SAC1 at induced ER-PM MCS. (A)**  
3 **Induction of artificial ER-PM MCS using rapamycin-induced dimerization of PM Lyn<sub>11</sub>-FRB and ER FKBP-**  
4 **CYB5A<sup>tail</sup>. (B) Over-expression of E-Syt2 does not deplete PtdIns4P.** COS-7 cells over-expressing GFP-  
5 tagged E-Syt2, ORP5 along with mCherry-P4Mx2; scale bar = 10  $\mu$ m. Graph shows P4M intensity at the  
6 plasma membrane (defined by CellMask deep red dye) normalized to total cell intensity; box and whisker plot  
7 shows quartiles and 5-95 percentiles of 89-90 cells from three independent experiments. P values derive from  
8 Dunn’s multiple comparison test compared to Ctrl after a Kruskal-Wallis test (P < 10<sup>-4</sup>). (C) **FKBP-CYB5<sup>tail</sup>**  
9 **induces narrower contact sites than those occupied by E-Syt2 or ORP5.** COS-7 cells expressing the  
10 indicated GFP-fusion protein, Lyn<sub>11</sub>-FRB-iRFP or mCherry-FKBP-CYB5<sup>tail</sup> (not shown), dimerization induced  
11 with Rapa as indicated. Graph shows the fraction of induced contact sites occupied by GFP-fluorescence after  
12 5 min of rapa treatment; box and whisker plot shows quartiles and 5-95 percentiles of 14-19 cells from four  
13 independent experiments. P values derive from Dunn’s multiple comparison test compared to Ctrl after a  
14 Kruskal-Wallis test (P < 10<sup>-4</sup>). (D) **An extended helical linker is required for robust “trans” activity of**  
15 **SAC1 at ER-PM MCS.** Images of TagBFP2-tagged FKBP-CYB5 and GFP-P4Mx2 in COS-7 cells co-transfected  
16 with iRFP-tagged Lyn<sub>11</sub>-FRB and the indicated mCherry-tagged SAC1 construct, or mCherry alone as control.  
17 Images of GFP-P4Mx2 are normalized to the mean pre-stimulation pixel intensity, i.e.  $F_t/F_{pre}$  with the color  
18 coding reflected in the graph y-axis. Scale bar = 20  $\mu$ m. Graphs show the fluorescence intensity of GFP-  
19 P4Mx2 in the TIRF footprint each cell (means  $\pm$  s.e., 29-30 cells from three independent experiments)  
20 normalized to the mean pre-stimulation level ( $F_{pre}$ ).
